# Supplementary material for: Pan-cancer driver copy number alterations identified by joint expression/CNA data analysis
Source: Sci Rep. 2020 Oct 14;10:17199. doi: 10.1038/s41598-020-74276-6 (PMC7566486; doi:10.1038/s41598-020-74276-6)
Supplement: Supplementary file 2 — Supplementary file2 [file 41598_2020_74276_MOESM2_ESM.xlsx]

## Sheet: Sheet1
Table S1. Number of cases in each type of cancer.
Cancer Type	Abbreviation	Size
Bladder Urothelial Carcinoma	BLCA	411
Breast invasive carcinoma	BRCA	1104
Cervical squamous cell carcinoma and endocervical adenocarcinoma	CESC	306
Colon adenocarcinoma	COAD	471
Head and Neck squamous cell carcinoma	HNSC	502
Kidney renal clear cell carcinoma	KIRC	535
Kidney renal papillary cell carcinoma	KIRP	289
Brain Lower Grade Glioma	LGG	529
Liver hepatocellular carcinoma	LIHC	374
Lung adenocarcinoma	LUAD	526
Ovarian serous cystadenocarcinoma	OV	379
Lung squamous cell carcinoma	LUSC	501
Prostate adenocarcinoma	PRAD	499
Sarcoma	SARC	263
Skin Cutaneous Melanoma	SKCM	471
Stomach adenocarcinoma	STAD	375
Thyroid carcinoma	THCA	510
Uterine Corpus Endometrial Carcinoma	UCEC	548
