# Supplementary material for: Pan-cancer driver copy number alterations identified by joint expression/CNA data analysis
Source: Sci Rep. 2020 Oct 14;10:17199. doi: 10.1038/s41598-020-74276-6 (PMC7566486; doi:10.1038/s41598-020-74276-6)
Supplement: Supplementary file 3 — Supplementary file3 [file 41598_2020_74276_MOESM3_ESM.xlsx]

## Sheet: Sheet1
Table S2. List of Top 20 genes of all genomically co-localized signatures.
Rank	Attractor.1	Gene.1	MI.1	Band.1	Attractor.2	Gene.2	MI.2	Band.2	Attractor.3	Gene.3	MI.3	Band.3	Attractor.4	Gene.4	MI.4	Band.4	Attractor.5	Gene.5	MI.5	Band.5	Attractor.6	Gene.6	MI.6	Band.6	Attractor.7	Gene.7	MI.7	Band.7	Attractor.8	Gene.8	MI.8	Band.8	Attractor.9	Gene.9	MI.9	Band.9	Attractor.10	Gene.10	MI.10	Band.10	Attractor.11	Gene.11	MI.11	Band.11	Attractor.12	Gene.12	MI.12	Band.12	Attractor.13
1	ENSG00000160087	UBE2J2	0.71567	chr1.p36.33	ENSG00000116691	MIIP	0.60271	chr1.p36.22	ENSG00000117419	ERI3	0.57804	chr1.p34.1	ENSG00000123091	RNF11	0.67956	chr1.p32.3	ENSG00000077254	USP33	0.62787	chr1.p31.1	ENSG00000117228	GBP1	0.81083	chr1.p22.2	ENSG00000143119	CD53	0.85425	chr1.p13.3	ENSG00000163159	VPS72	0.69234	chr1.q21.3	ENSG00000163216	SPRR2D	0.78154	chr1.q21.3	ENSG00000160688	FLAD1	0.59372	chr1.q21.3	ENSG00000158714	SLAMF8	0.74514	chr1.q23.2	ENSG00000118873	RAB3GAP2	0.66721	chr1.q41	ENSG00000241351
2	ENSG00000175756	AURKAIP1	0.70489	chr1.p36.33	ENSG00000116685	KIAA2013	0.60059	chr1.p36.22	ENSG00000171960	PPIH	0.56873	chr1.p34.2	ENSG00000085832	EPS15	0.54361	chr1.p32.3	ENSG00000118454	ANKRD13C	0.59211	chr1.p31.1	ENSG00000162654	GBP4	0.72204	chr1.p22.2	ENSG00000116824	CD2	0.78057	chr1.p13.1	ENSG00000159377	PSMB4	0.62687	chr1.q21.3	ENSG00000241794	SPRR2A	0.74909	chr1.q21.3	ENSG00000143314	MRPL24	0.55683	chr1.q23.1	ENSG00000117091	CD48	0.69559	chr1.q23.3	ENSG00000182827	ACBD3	0.6398	chr1.q42.12	ENSG00000211592
3	ENSG00000127054	INTS11	0.66257	chr1.p36.33	ENSG00000116649	SRM	0.56195	chr1.p36.22	ENSG00000164008	C1orf50	0.5135	chr1.p34.2	ENSG00000159592	GPBP1L1	0.52989	chr1.p34.1	ENSG00000198160	MIER1	0.57562	chr1.p31.3	ENSG00000225492	GBP1P1	0.67025	chr1.p22.2	ENSG00000225079	FTH1P22	0.60985	chr1.p13.1	ENSG00000159352	PSMD4	0.59978	chr1.q21.3	ENSG00000203785	SPRR2E	0.73491	chr1.q21.3	ENSG00000143294	PRCC	0.52621	chr1.q23.1	ENSG00000066294	CD84	0.68136	chr1.q23.3	ENSG00000143751	SDE2	0.6188	chr1.q42.12	ENSG00000243466
4	ENSG00000224051	CPTP	0.6298	chr1.p36.33	ENSG00000142655	PEX14	0.54857	chr1.p36.22	ENSG00000084072	PPIE	0.51128	chr1.p34.2	ENSG00000162368	CMPK1	0.52711	chr1.p33	ENSG00000066557	LRRC40	0.54502	chr1.p31.1	ENSG00000154451	GBP5	0.66509	chr1.p22.2	ENSG00000143110	C1orf162	0.56841	chr1.p13.2	ENSG00000163156	SCNM1	0.5806	chr1.q21.3	ENSG00000169469	SPRR1B	0.65146	chr1.q21.3	ENSG00000116521	SCAMP3	0.51906	chr1.q22	ENSG00000158869	FCER1G	0.65991	chr1.q23.3	ENSG00000136628	EPRS	0.58915	chr1.q41	ENSG00000244437
5	ENSG00000197785	ATAD3A	0.62396	chr1.p36.33	ENSG00000177674	AGTRAP	0.53553	chr1.p36.22	ENSG00000126088	UROD	0.50447	chr1.p34.1	ENSG00000159658	EFCAB14	0.52447	chr1.p33	ENSG00000036549	ZZZ3	0.54495	chr1.p31.1	ENSG00000162645	GBP2	0.56198	chr1.p22.2	ENSG00000134242	PTPN22	0.56356	chr1.p13.2	ENSG00000143436	MRPL9	0.52045	chr1.q21.3	ENSG00000169474	SPRR1A	0.55449	chr1.q21.3	ENSG00000163382	NAXE	0.51872	chr1.q22	ENSG00000162739	SLAMF6	0.65017	chr1.q23.2	ENSG00000067704	IARS2	0.58828	chr1.q41	ENSG00000211598
6	ENSG00000162585	FAAP20	0.57578	chr1.p36.33	ENSG00000116670	MAD2L2	0.50145	chr1.p36.22	ENSG00000117395	EBNA1BP2	0.49562	chr1.p34.2	ENSG00000117859	OSBPL9	0.28917	chr1.p32.3	ENSG00000180488	MIGA1	0.4509	chr1.p31.1	ENSG00000137959	IFI44L	0.32301	chr1.p31.1	ENSG00000259834	AL365361.1	0.44385	chr1.p13.3	ENSG00000143575	HAX1	0.50133	chr1.q21.3	ENSG00000163209	SPRR3	0.53928	chr1.q21.3	ENSG00000143575	HAX1	0.49817	chr1.q21.3	ENSG00000186517	ARHGAP30	0.64618	chr1.q23.3	ENSG00000143756	FBXO28	0.57462	chr1.q42.11	ENSG00000239951
7	ENSG00000116213	WRAP73	0.56264	chr1.p36.32	ENSG00000132879	FBXO44	0.31919	chr1.p36.22	ENSG00000164011	ZNF691	0.47936	chr1.p34.2	ENSG00000197429	IPP	0.25296	chr1.p34.1	ENSG00000162607	USP1	0.44859	chr1.p31.3	ENSG00000137965	IFI44	0.28966	chr1.p31.1	ENSG00000177272	KCNA3	0.39116	chr1.p13.3	ENSG00000160688	FLAD1	0.49132	chr1.q21.3	ENSG00000196805	SPRR2B	0.39836	chr1.q21.3	ENSG00000116586	LAMTOR2	0.47346	chr1.q22	ENSG00000163563	MNDA	0.64405	chr1.q23.1	ENSG00000069248	NUP133	0.55568	chr1.q42.13	ENSG00000239855
8	ENSG00000224870	AL391244.1	0.55622	chr1.p36.33	ENSG00000120942	UBIAD1	0.28934	chr1.p36.22	ENSG00000187147	RNF220	0.45553	chr1.p34.1	ENSG00000078618	NRDC	0.24257	chr1.p32.3	ENSG00000142864	SERBP1	0.44333	chr1.p31.3	ENSG00000162676	GFI1	0.27487	chr1.p22.1	ENSG00000184371	CSF1	0.29948	chr1.p13.3	ENSG00000160741	CRTC2	0.44697	chr1.q21.3	ENSG00000244094	SPRR2F	0.36514	chr1.q21.3	ENSG00000173171	MTX1	0.46973	chr1.q22	ENSG00000203747	FCGR3A	0.63253	chr1.q23.3	ENSG00000119285	HEATR1	0.54731	chr1.q43	ENSG00000241755
9	ENSG00000204859	ZBTB48	0.55519	chr1.p36.31	ENSG00000175279	CENPS	0.25198	chr1.p36.22	ENSG00000159479	MED8	0.45167	chr1.p34.2	ENSG00000134717	BTF3L4	0.22822	chr1.p32.3	ENSG00000162613	FUBP1	0.37394	chr1.p31.1	ENSG00000234518	PTGES3P1	0.24428	chr1.p22.2	ENSG00000121933	TMIGD3	0.26638	chr1.p13.2	ENSG00000143543	JTB	0.43924	chr1.q21.3	ENSG00000229035	SPRR2C	0.35865	chr1.q21.3	ENSG00000143543	JTB	0.46839	chr1.q21.3	ENSG00000117090	SLAMF1	0.6297	chr1.q23.3	ENSG00000162923	WDR26	0.50679	chr1.q42.11	ENSG00000211632
10	ENSG00000107404	DVL1	0.55096	chr1.p36.33	ENSG00000178585	CTNNBIP1	0.2272	chr1.p36.22	ENSG00000117410	ATP6V0B	0.42915	chr1.p34.1	ENSG00000266993	AL050343.1	0.1781	chr1.p32.3	ENSG00000116641	DOCK7	0.34705	chr1.p31.3	ENSG00000183347	GBP6	0.2157	chr1.p22.2	ENSG00000116748	AMPD1	0.1785	chr1.p13.2	ENSG00000143553	SNAPIN	0.42204	chr1.q21.3	ENSG00000159516	SPRR2G	0.34029	chr1.q21.3	ENSG00000163344	PMVK	0.45058	chr1.q21.3	ENSG00000026751	SLAMF7	0.62658	chr1.q23.3	ENSG00000054267	ARID4B	0.48929	chr1.q42.3	ENSG00000240671
11	ENSG00000188976	NOC2L	0.55017	chr1.p36.33	ENSG00000171824	EXOSC10	0.21821	chr1.p36.22	ENSG00000070785	EIF2B3	0.40929	chr1.p34.1	ENSG00000132122	SPATA6	0.16162	chr1.p33	ENSG00000254685	FPGT	0.34385	chr1.p31.1	ENSG00000153898	MCOLN2	0.19153	chr1.p22.3	ENSG00000134256	CD101	0.16453	chr1.p13.1	ENSG00000160714	UBE2Q1	0.4167	chr1.q21.3	ENSG00000163207	IVL	0.3148	chr1.q21.3	ENSG00000125459	MSTO1	0.44868	chr1.q22	ENSG00000163564	PYHIN1	0.5449	chr1.q23.1	ENSG00000010072	SPRTN	0.48407	chr1.q42.2	ENSG00000211625
12	ENSG00000131591	C1orf159	0.54188	chr1.p36.33	ENSG00000160049	DFFA	0.21739	chr1.p36.22	ENSG00000132773	TOE1	0.39555	chr1.p34.1	ENSG00000234329	AL604028.2	0.16106	chr1.p34.1	ENSG00000142892	PIGK	0.34034	chr1.p31.1	ENSG00000117226	GBP3	0.16645	chr1.p22.2	ENSG00000064886	CHI3L2	0.15675	chr1.p13.2	ENSG00000163348	PYGO2	0.41524	chr1.q21.3	ENSG00000163202	LCE3D	0.273	chr1.q21.3	ENSG00000160767	FAM189B	0.44635	chr1.q22	ENSG00000122224	LY9	0.53149	chr1.q23.3	ENSG00000162819	BROX	0.48047	chr1.q41	ENSG00000240864
13	ENSG00000176022	B3GALT6	0.53854	chr1.p36.33	ENSG00000083444	PLOD1	0.21579	chr1.p36.22	ENSG00000132768	DPH2	0.39139	chr1.p34.1	ENSG00000228237	EFCAB14-AS1	0.1321	chr1.p33	ENSG00000117054	ACADM	0.33311	chr1.p31.1	ENSG00000171488	LRRC8C	0.16	chr1.p22.2	ENSG00000162777	DENND2D	0.14003	chr1.p13.3	ENSG00000143373	ZNF687	0.38264	chr1.q21.3	ENSG00000169509	CRCT1	0.27046	chr1.q21.3	ENSG00000163463	KRTCAP2	0.44511	chr1.q22	ENSG00000143226	FCGR2A	0.49831	chr1.q23.3	ENSG00000173726	TOMM20	0.47738	chr1.q42.3	ENSG00000240382
14	ENSG00000169972	PUSL1	0.51934	chr1.p36.33	ENSG00000116663	FBXO6	0.21475	chr1.p36.22	ENSG00000177868	SVBP	0.37048	chr1.p34.2	ENSG00000225447	RPS15AP10	0.13129	chr1.p34.1	ENSG00000203965	EFCAB7	0.32671	chr1.p31.3	ENSG00000233235	BX119321.1	0.10769	chr1.p22.2	ENSG00000116774	OLFML3	0.11617	chr1.p13.2	ENSG00000163155	LYSMD1	0.36805	chr1.q21.3	ENSG00000159527	PGLYRP3	0.26723	chr1.q21.3	ENSG00000179085	DPM3	0.42391	chr1.q22	ENSG00000072694	FCGR2B	0.46817	chr1.q23.3	ENSG00000135776	ABCB10	0.45686	chr1.q42.13	ENSG00000243063
15	ENSG00000242485	MRPL20	0.49734	chr1.p36.33	ENSG00000142657	PGD	0.19109	chr1.p36.22	ENSG00000117411	B4GALT2	0.36856	chr1.p34.1	ENSG00000117862	TXNDC12	0.12917	chr1.p32.3	ENSG00000172380	GNG12	0.3037	chr1.p31.3	ENSG00000213512	GBP7	0.09076	chr1.p22.2	ENSG00000183508	FAM46C	0.1117	chr1.p12	ENSG00000163344	PMVK	0.33844	chr1.q21.3	ENSG00000234262	AL356867.1	0.24817	chr1.q21.3	ENSG00000160741	CRTC2	0.40634	chr1.q21.3	ENSG00000122223	CD244	0.42131	chr1.q23.3	ENSG00000143498	TAF1A	0.44454	chr1.q41	ENSG00000224041
16	ENSG00000041988	THAP3	0.49179	chr1.p36.31	ENSG00000251503	CENPS-CORT	0.18692	chr1.p36.22	ENSG00000132781	MUTYH	0.36625	chr1.p34.1	ENSG00000132128	LRRC41	0.12635	chr1.p34.1	ENSG00000116754	SRSF11	0.26934	chr1.p31.1	ENSG00000162614	NEXN	0.08491	chr1.p31.1	ENSG00000231128	AL137856.1	0.09699	chr1.p13.2	ENSG00000143393	PI4KB	0.3301	chr1.q21.3	ENSG00000184148	SPRR4	0.23741	chr1.q21.3	ENSG00000160714	UBE2Q1	0.38757	chr1.q21.3	ENSG00000181036	FCRL6	0.40752	chr1.q23.2	ENSG00000116903	EXOC8	0.44269	chr1.q42.2	ENSG00000239819
17	ENSG00000197530	MIB2	0.47926	chr1.p36.33	ENSG00000230337	AL109811.2	0.17912	chr1.p36.22	ENSG00000066136	NFYC	0.34491	chr1.p34.2	ENSG00000159596	TMEM69	0.11953	chr1.p34.1	ENSG00000162623	TYW3	0.26783	chr1.p31.1	ENSG00000234184	LINC01781	0.08037	chr1.p31.1	ENSG00000116473	RAP1A	0.09155	chr1.p13.2	ENSG00000173207	CKS1B	0.31114	chr1.q21.3	ENSG00000185966	LCE3E	0.20757	chr1.q21.3	ENSG00000160783	PMF1	0.38317	chr1.q22	ENSG00000160856	FCRL3	0.37159	chr1.q23.1	ENSG00000186063	AIDA	0.44073	chr1.q41	ENSG00000233999
18	ENSG00000248333	CDK11B	0.46932	chr1.p36.33	ENSG00000173614	NMNAT1	0.16695	chr1.p36.22	ENSG00000178028	DMAP1	0.34429	chr1.p34.1	ENSG00000117481	NSUN4	0.11568	chr1.p33	ENSG00000132485	ZRANB2	0.26254	chr1.p31.1	ENSG00000238015	AC104837.2	0.0741	chr1.p31.1	ENSG00000213262	VDAC2P3	0.08163	chr1.p12	ENSG00000160679	CHTOP	0.28878	chr1.q21.3	ENSG00000215853	RPTN	0.17046	chr1.q21.3	ENSG00000163348	PYGO2	0.37892	chr1.q21.3	ENSG00000143297	FCRL5	0.35925	chr1.q23.1	ENSG00000092978	GPATCH2	0.43155	chr1.q41	ENSG00000242371
19	ENSG00000078808	SDF4	0.46856	chr1.p36.33	ENSG00000241563	CORT	0.15498	chr1.p36.22	ENSG00000126107	HECTD3	0.28594	chr1.p34.1	ENSG00000269956	MKNK1-AS1	0.10797	chr1.p33	ENSG00000213625	LEPROT	0.26004	chr1.p31.3	ENSG00000162618	ADGRL4	0.06419	chr1.p31.1	ENSG00000156171	DRAM2	0.06875	chr1.p13.3	ENSG00000143363	PRUNE1	0.27624	chr1.q21.3	ENSG00000224308	LINC01527	0.16342	chr1.q21.3	ENSG00000143553	SNAPIN	0.36803	chr1.q21.3	ENSG00000163568	AIM2	0.3485	chr1.q23.1	ENSG00000143742	SRP9	0.41773	chr1.q42.12	ENSG00000244575
20	ENSG00000160075	SSU72	0.43296	chr1.p36.33	ENSG00000116661	FBXO2	0.10404	chr1.p36.22	ENSG00000126106	TMEM53	0.28473	chr1.p34.1	ENSG00000123473	STIL	0.10316	chr1.p33	ENSG00000116704	SLC35D1	0.24471	chr1.p31.3	ENSG00000231999	LRRC8C-DT	0.0616	chr1.p22.2	ENSG00000116815	CD58	0.05807	chr1.p13.1	ENSG00000143621	ILF2	0.26084	chr1.q21.3	ENSG00000143546	S100A8	0.16038	chr1.q21.3	ENSG00000143303	RRNAD1	0.3669	chr1.q23.1	ENSG00000244682	FCGR2C	0.29876	chr1.q23.3	ENSG00000174606	ANGEL2	0.4039	chr1.q32.3	ENSG00000243238
[truncated: 355 more columns]
