# Supplementary material for: Pan-cancer driver copy number alterations identified by joint expression/CNA data analysis
Source: Sci Rep. 2020 Oct 14;10:17199. doi: 10.1038/s41598-020-74276-6 (PMC7566486; doi:10.1038/s41598-020-74276-6)
Supplement: Supplementary file 4 — Supplementary file4 [file 41598_2020_74276_MOESM4_ESM.xlsx]

## Sheet: Sheet1
Table S3. Expression-CNV association of each genomically co-localized signature.
	Gene	MI	MI.P.Value	Band
ENSG00000160087	UBE2J2	0.172374	0	chr1.p36.33
ENSG00000116691	MIIP	0.204215	0	chr1.p36.22
ENSG00000117419	ERI3	0.296417	0	chr1.p34.1
ENSG00000123091	RNF11	0.208289	0	chr1.p32.3
ENSG00000077254	USP33	0.25223	0	chr1.p31.1
ENSG00000117228	GBP1	0.0334637	1	chr1.p22.2
ENSG00000143119	CD53	0.0280532	0.4242	chr1.p13.3
ENSG00000163159	VPS72	0.429024	0	chr1.q21.3
ENSG00000163216	SPRR2D	-0.00516762	1	chr1.q21.3
ENSG00000160688	FLAD1	0.358433	0	chr1.q21.3
ENSG00000158714	SLAMF8	-0.0247742	1	chr1.q23.2
ENSG00000118873	RAB3GAP2	0.268492	0	chr1.q41
ENSG00000241351	IGKV3-11	-0.0121018	1	chr2.p11.2
ENSG00000196504	PRPF40A	0.15607	0	chr2.q23.3
ENSG00000115020	PIKFYVE	0.0946475	0	chr2.q34
ENSG00000170248	PDCD6IP	0.199814	0	chr3.p22.3
ENSG00000164081	TEX264	0.206669	0	chr3.p21.2
ENSG00000157500	APPL1	0.162995	0	chr3.p14.3
ENSG00000163519	TRAT1	-0.00966953	1	chr3.q13.13
ENSG00000132394	EEFSEC	0.287588	0	chr3.q21.3
ENSG00000121879	PIK3CA	0.219065	0	chr3.q26.32
ENSG00000180370	PAK2	0.362531	0	chr3.q29
ENSG00000078140	UBE2K	0.211037	0	chr4.p14
ENSG00000138768	USO1	0.226339	0	chr4.q21.1
ENSG00000164031	DNAJB14	0.280092	0	chr4.q23
ENSG00000082213	C5orf22	0.318585	0	chr5.p13.3
ENSG00000122008	POLK	0.201452	0	chr5.q13.3
ENSG00000072364	AFF4	0.173567	0	chr5.q31.1
ENSG00000278828	HIST1H3H	0.0258838	1	chr6.p22.1
ENSG00000234745	HLA-B	0.0253669	1	chr6.p21.33
ENSG00000223865	HLA-DPB1	-0.0100527	1	chr6.p21.32
ENSG00000124733	MEA1	0.472625	0	chr6.p21.1
ENSG00000118412	CASP8AP2	0.239096	0	chr6.q15
ENSG00000131023	LATS1	0.25344	0	chr6.q25.1
ENSG00000106009	BRAT1	0.277726	0	chr7.p22.3
ENSG00000001631	KRIT1	0.247466	0	chr7.q21.2
ENSG00000005075	POLR2J	0.306789	0	chr7.q22.1
ENSG00000243302	AC018638.4	0.0491782	0.101	chr7.q32.1
ENSG00000211751	TRBC1	-0.0184188	1	chr7.q34
ENSG00000133574	GIMAP4	-0.00856198	1	chr7.q36.1
ENSG00000158941	CCAR2	0.603048	0	chr8.p21.3
ENSG00000129691	ASH2L	0.622403	0	chr8.p11.23
ENSG00000104442	ARMC1	0.332253	0	chr8.q13.1
ENSG00000147679	UTP23	0.336732	0	chr8.q24.11
ENSG00000179526	SHARPIN	0.34389	0	chr8.q24.3
ENSG00000165283	STOML2	0.413197	0	chr9.p13.3
ENSG00000135018	UBQLN1	0.206961	0	chr9.q21.32
ENSG00000136908	DPM2	0.227183	0	chr9.q34.11
ENSG00000136758	YME1L1	0.285616	0	chr10.p12.1
ENSG00000122958	VPS26A	0.170814	0	chr10.q22.1
ENSG00000055950	MRPL43	0.186478	0	chr10.q24.31
ENSG00000165832	TRUB1	0.177027	0	chr10.q25.3
ENSG00000174775	HRAS	0.143766	0	chr11.p15.5
ENSG00000205339	IPO7	0.179056	0	chr11.p15.4
ENSG00000121680	PEX16	0.28662	0	chr11.p11.2
ENSG00000173465	SSSCA1	0.117469	0	chr11.q13.1
ENSG00000166266	CUL5	0.265667	0	chr11.q22.3
ENSG00000198851	CD3E	0.0273748	1	chr11.q23.3
ENSG00000152944	MED21	0.428499	0	chr12.p11.23
ENSG00000139637	C12orf10	0.190113	0	chr12.q13.13
ENSG00000135392	DNAJC14	0.183896	0	chr12.q13.2
ENSG00000058272	PPP1R12A	0.117332	0	chr12.q21.2
ENSG00000139726	DENR	0.233138	0	chr12.q24.31
ENSG00000139496	NUP58	0.286357	0	chr13.q12.13
ENSG00000133103	COG6	0.241653	0	chr13.q14.11
ENSG00000277734	TRAC	-0.0281276	1	chr14.q11.2
ENSG00000092140	G2E3	0.343586	0	chr14.q12
ENSG00000070367	EXOC5	0.254075	0	chr14.q22.3
ENSG00000100815	TRIP11	0.234245	0	chr14.q32.12
ENSG00000211893	IGHG2	-0.00716462	1	chr14.q32.33
ENSG00000279192	PWAR5	0.0530212	0.0909	chr15.q11.2
ENSG00000156970	BUB1B	0.0464597	0.0303	chr15.q15.1
ENSG00000128989	ARPP19	0.22097	0	chr15.q21.2
ENSG00000095906	NUBP2	0.199928	0	chr16.p13.3
ENSG00000102879	CORO1A	-0.0125617	1	chr16.p11.2
ENSG00000270472	IGHV3OR16-9	-0.00848324	1	chr16.p11.2
ENSG00000169715	MT1E	0.0472844	0.4343	chr16.q13
ENSG00000168701	TMEM208	0.270114	0	chr16.q22.1
ENSG00000198931	APRT	0.231527	0	chr16.q24.3
ENSG00000142507	PSMB6	0.268815	0	chr17.p13.2
ENSG00000267745	AC060766.7	0.0365982	0.8181	chr17.q12
ENSG00000108511	HOXB6	0.0164425	1	chr17.q21.32
ENSG00000141367	CLTC	0.21779	0	chr17.q23.1
ENSG00000169727	GPS1	0.245592	0	chr17.q25.3
ENSG00000267702	AP005131.6	0.0311177	1	chr18.p11.21
ENSG00000179271	GADD45GIP1	0.0900433	0	chr19.p13.13
ENSG00000105258	POLR2I	0.292534	0	chr19.q13.12
ENSG00000197050	ZNF420	0.26727	0	chr19.q13.12
ENSG00000142546	NOSIP	0.197298	0	chr19.q13.33
ENSG00000129450	SIGLEC9	0.0103524	1	chr19.q13.41
ENSG00000133265	HSPBP1	0.220798	0	chr19.q13.42
ENSG00000213762	ZNF134	0.217949	0	chr19.q13.43
ENSG00000125835	SNRPB	0.409495	0	chr20.p13
ENSG00000125995	ROMO1	0.366844	0	chr20.q11.22
ENSG00000101181	MTG2	0.306535	0	chr20.q13.33
ENSG00000159256	MORC3	0.198826	0	chr21.q22.12
ENSG00000184436	THAP7	0.220752	0	chr22.q11.21
ENSG00000211677	IGLC2	-0.00784209	1	chr22.q11.22
ENSG00000100319	ZMAT5	0.307877	0	chr22.q12.2
ENSG00000128340	RAC2	0.0318345	0.6868	chr22.q13.1
ENSG00000073169	SELENOO	0.178696	0	chr22.q13.33
