# Supplementary material for: Pan-cancer driver copy number alterations identified by joint expression/CNA data analysis
Source: Sci Rep. 2020 Oct 14;10:17199. doi: 10.1038/s41598-020-74276-6 (PMC7566486; doi:10.1038/s41598-020-74276-6)
Supplement: Supplementary file 5 — Supplementary file5 [file 41598_2020_74276_MOESM5_ESM.xlsx]

## Sheet: Amp
Table S4. Amplification and deletion frequency of genomically co-localized signatures.
	AmpCount	BLCA	BRCA	CESC	COAD	HNSC	KIRC	KIRP	LGG	LIHC	LUAD	OV	LUSC	PRAD	SARC	SKCM	STAD	THCA	UCEC
UBE2J2	4	0.0195122	0.0201097	0.0238095	0.0152174	0.0203666	0.00568182	0.00347222	0.00379507	0.00537634	0.0228571	0.119241	0.04	0	0.0725191	0.0297872	0.0320856	0	0.0240296
MIIP	2	0.0195122	0.00457038	0.0136054	0	0.00814664	0	0.00347222	0	0.00806452	0.0152381	0.0867209	0.008	0	0.0572519	0.0297872	0.026738	0	0.0166359
ERI3	3	0.0463415	0.0228519	0.0238095	0.00434783	0.0142566	0	0.00694444	0.00189753	0.0134409	0.0152381	0.186992	0.022	0	0.0610687	0.0234043	0.0026738	0	0.0277264
RNF11	2	0.0219512	0.0137112	0.0272109	0.00217391	0.00814664	0	0.00694444	0.00189753	0.0134409	0.00952381	0.130081	0.01	0	0.0572519	0.0297872	0.0026738	0	0.0166359
USP33	2	0.0195122	0.0146252	0.0272109	0	0	0	0.00694444	0.00189753	0.0107527	0.00761905	0.0569106	0.004	0	0.0877863	0.0234043	0.0026738	0	0.00554529
GBP1	3	0.0195122	0.0228519	0.0204082	0	0	0	0.00347222	0.0056926	0.0188172	0.0114286	0.0704607	0.006	0.00201613	0.0801527	0.0319149	0	0	0.00554529
CD53	2	0.0146341	0.0182815	0.0102041	0	0.00203666	0	0	0.00189753	0.0188172	0.00190476	0.0569106	0.006	0.00403226	0.0229008	0.0510638	0.0026738	0	0.00739372
VPS72	13	0.187805	0.354662	0.173469	0.0391304	0.0468432	0.0189394	0.0173611	0.00759013	0.430108	0.228571	0.379404	0.134	0.0241935	0.175573	0.202128	0.0721925	0.0157791	0.266174
SPRR2D	13	0.160976	0.348263	0.173469	0.0369565	0.0407332	0.0151515	0.0208333	0.0113852	0.459677	0.205714	0.327913	0.142	0.0201613	0.183206	0.225532	0.0721925	0.0157791	0.242144
FLAD1	12	0.104878	0.343693	0.14966	0.0391304	0.0285132	0.0151515	0.0208333	0.0151803	0.459677	0.194286	0.330623	0.118	0.0141129	0.145038	0.195745	0.0614973	0.0138067	0.245841
SLAMF8	13	0.231707	0.357404	0.146259	0.0391304	0.0305499	0.0170455	0.0208333	0.00948767	0.462366	0.179048	0.300813	0.136	0.0100806	0.156489	0.193617	0.0454545	0.0157791	0.22366
RAB3GAP2	13	0.0390244	0.361974	0.119048	0.0347826	0.0407332	0.0113636	0.0173611	0.00948767	0.405914	0.11619	0.205962	0.096	0.0120968	0.0534351	0.189362	0.0454545	0.0138067	0.203327
IGKV3-11	5	0.0439024	0.0109689	0.0408163	0.00869565	0.0162933	0.0094697	0.00347222	0.00189753	0.00806452	0.00761905	0.0921409	0.038	0	0.0419847	0.00638298	0	0	0.0147874
PRPF40A	1	0.0097561	0.00182815	0.00680272	0.00217391	0.0162933	0.00568182	0.0104167	0	0.0107527	0.00952381	0.0813008	0.016	0	0.0114504	0.00425532	0	0	0.012939
PIKFYVE	1	0.00731707	0.00822669	0.0136054	0.0108696	0.00814664	0.00189394	0.0104167	0.00189753	0.016129	0.0114286	0.0813008	0.012	0.00403226	0.00381679	0.00212766	0.0106952	0	0.0147874
PDCD6IP	3	0.0634146	0.0137112	0.00340136	0	0	0.00189394	0.0104167	0.0056926	0.016129	0	0.0406504	0.002	0.00403226	0.0381679	0.0191489	0.00534759	0	0.0147874
TEX264	1	0.0097561	0.000914077	0	0	0	0	0.00347222	0.00189753	0.0107527	0	0.0379404	0	0.00201613	0.0152672	0.00638298	0.0026738	0	0.012939
APPL1	1	0.00731707	0.000914077	0	0	0	0	0.00347222	0.00189753	0.00537634	0	0.0352304	0	0.00201613	0.019084	0.012766	0	0	0.00369686
TRAT1	7	0.0487805	0.0255941	0.268707	0.00869565	0.138493	0.00378788	0.0243056	0	0.0107527	0.0171429	0.249322	0.226	0.00806452	0.0305344	0.00638298	0.0294118	0	0.0314233
EEFSEC	6	0.0634146	0.0274223	0.316327	0.00869565	0.150713	0.00378788	0.0208333	0.00189753	0.0134409	0.0190476	0.273713	0.244	0.0241935	0.0267176	0.0148936	0.0213904	0	0.0591497
PIK3CA	11	0.114634	0.083181	0.493197	0.0173913	0.342159	0.0227273	0.0277778	0.0113852	0.0483871	0.0495238	0.658537	0.634	0.0322581	0.0229008	0.0148936	0.0935829	0	0.15342
PAK2	11	0.119512	0.0822669	0.496599	0.0391304	0.350305	0.0151515	0.0243056	0.0113852	0.0456989	0.0457143	0.533875	0.598	0.0120968	0.0267176	0.0191489	0.0802139	0	0.158965
UBE2K	2	0.00243902	0.00548446	0	0.00217391	0.00203666	0.00189394	0	0.00189753	0.0322581	0.0228571	0.0271003	0.014	0	0.0496183	0.0255319	0.00534759	0.00197239	0.00924214
USO1	5	0.0341463	0.0365631	0.0136054	0.00434783	0.0101833	0.00189394	0	0	0.00537634	0.00952381	0.0623306	0.036	0.00604839	0.0343511	0.0148936	0.0106952	0.00197239	0.00924214
DNAJB14	0	0.00487805	0.0127971	0.00680272	0	0	0.00189394	0	0	0.00268817	0	0	0.004	0	0.0152672	0.0106383	0	0.00197239	0.00739372
C5orf22	14	0.207317	0.0639854	0.227891	0.0347826	0.156823	0.0397727	0.0277778	0.00379507	0.0994624	0.207619	0.222222	0.336	0.0141129	0.198473	0.0659574	0.101604	0.00788955	0.0536044
POLK	2	0.00243902	0.0109689	0	0	0.00407332	0.0246212	0.0104167	0.00189753	0.0322581	0.00761905	0.00271003	0	0	0.0305344	0.0212766	0	0.00394477	0.00369686
AFF4	3	0.00731707	0.011883	0.00340136	0	0.00407332	0.0662879	0.0208333	0.00189753	0.0403226	0.00571429	0.0271003	0	0.00201613	0.0381679	0.0106383	0.0026738	0.00394477	0.00369686
HIST1H3H	7	0.0560976	0.0420475	0.0510204	0.0130435	0.0142566	0	0	0.00379507	0.19086	0.047619	0.184282	0.028	0.00201613	0.0229008	0.225532	0.013369	0.00197239	0.0277264
HLA-B	8	0.0341463	0.0429616	0.047619	0.0195652	0.0162933	0.00189394	0	0.00759013	0.182796	0.0380952	0.154472	0.024	0.00201613	0.0267176	0.223404	0.0374332	0.00197239	0.0295749
HLA-DPB1	12	0.0341463	0.0493601	0.047619	0.0369565	0.0224033	0.00189394	0.00347222	0.00948767	0.177419	0.0742857	0.197832	0.038	0.00201613	0.0458015	0.206383	0.0427807	0.00197239	0.038817
MEA1	11	0.0317073	0.0457038	0.0408163	0.0217391	0.0224033	0.00378788	0.0173611	0.0056926	0.174731	0.0552381	0.149051	0.044	0.00201613	0.0419847	0.197872	0.0802139	0.00197239	0.0425139
CASP8AP2	1	0.00243902	0.0137112	0.0102041	0.00434783	0.00407332	0	0	0	0.0107527	0.00190476	0.0542005	0.028	0	0.0267176	0.00851064	0.00534759	0	0.012939
LATS1	1	0.00243902	0.0191956	0.00340136	0.00869565	0.00610998	0	0	0	0.00806452	0.00190476	0.0162602	0.024	0	0.10687	0.00212766	0.0160428	0	0.00739372
BRAT1	15	0.0707317	0.0466179	0.0272109	0.184783	0.0733198	0.0492424	0.229167	0.0815939	0.0860215	0.110476	0.0731707	0.088	0.0322581	0.0916031	0.219149	0.0989305	0.0118343	0.025878
KRIT1	16	0.0317073	0.0319927	0.0510204	0.106522	0.0814664	0.0435606	0.25	0.125237	0.077957	0.047619	0.127371	0.106	0.0504032	0.103053	0.22766	0.128342	0.0157791	0.025878
POLR2J	16	0.0341463	0.0265082	0.0340136	0.0978261	0.0773931	0.0397727	0.225694	0.119545	0.0483871	0.0552381	0.149051	0.094	0.0423387	0.0687023	0.193617	0.0855615	0.0138067	0.0314233
AC018638.4	14	0.0390244	0.0374771	0.0272109	0.104348	0.0162933	0.0530303	0.25	0.149905	0.0672043	0.0609524	0.214092	0.056	0.0362903	0.0839695	0.261702	0.0294118	0.0197239	0.0332717
TRBC1	16	0.0536585	0.0548446	0.0340136	0.163043	0.0244399	0.0492424	0.347222	0.172676	0.102151	0.0609524	0.311653	0.054	0.0544355	0.0839695	0.314894	0.040107	0.0197239	0.0425139
GIMAP4	11	0.0243902	0.0310786	0.0204082	0.0847826	0.0142566	0.0454545	0.246528	0.148008	0.0806452	0.0495238	0.276423	0.032	0.0282258	0.0534351	0.257447	0.0160428	0.0177515	0.0295749
CCAR2	4	0.0097561	0.0146252	0.00680272	0.0282609	0.0101833	0	0.00694444	0.0170778	0.00268817	0.00380952	0.0162602	0	0.00403226	0.0343511	0.0404255	0.0508021	0	0.051756
ASH2L	13	0.121951	0.202011	0.0238095	0.0847826	0.0855397	0.00189394	0.0104167	0.0170778	0.0376344	0.0552381	0.108401	0.184	0.0504032	0.0725191	0.0446809	0.0508021	0	0.0831793
ARMC1	14	0.131707	0.222121	0.0748299	0.182609	0.1222	0.0132576	0.00694444	0.0189753	0.293011	0.106667	0.271003	0.088	0.0826613	0.0725191	0.159574	0.104278	0	0.131238
UTP23	15	0.192683	0.35192	0.119048	0.221739	0.191446	0.0189394	0.0138889	0.0796964	0.416667	0.154286	0.506775	0.15	0.133065	0.0916031	0.208511	0.195187	0	0.15342
SHARPIN	15	0.160976	0.3117	0.112245	0.271739	0.221996	0.0246212	0.0138889	0.0759013	0.389785	0.173333	0.563686	0.23	0.100806	0.0992366	0.219149	0.18984	0	0.134935
STOML2	6	0.0317073	0.0255941	0.0238095	0.026087	0.0631365	0.00568182	0.00694444	0.00379507	0.00537634	0.00952381	0.0569106	0.09	0.0141129	0.0419847	0.0148936	0.0347594	0	0.0203327
UBQLN1	3	0.00487805	0.00365631	0.0340136	0.0108696	0.0305499	0.00189394	0	0.0113852	0.00537634	0.00380952	0.0189702	0.016	0.0181452	0.0763359	0.00212766	0.0026738	0	0.00184843
DPM2	2	0.00731707	0.0155393	0.0306122	0.00869565	0.0264766	0.00189394	0.00347222	0.00759013	0.00806452	0.00571429	0.0298103	0.018	0.0262097	0.0419847	0.00638298	0.0213904	0	0.00554529
YME1L1	8	0.0487805	0.0429616	0.00340136	0.0108696	0.01222	0	0.0104167	0.0360531	0.0349462	0.0304762	0.121951	0.028	0	0.019084	0.00638298	0.0320856	0	0.0499076
VPS26A	2	0.00243902	0.0127971	0	0.00869565	0.00814664	0	0.00347222	0	0.00268817	0.00952381	0.0460705	0.014	0.00806452	0.00381679	0	0.0187166	0	0.0406654
MRPL43	1	0	0.00548446	0.00340136	0	0	0	0.00347222	0.00189753	0.00806452	0.00190476	0.0298103	0	0.00201613	0.00381679	0	0.0106952	0	0.0480591
TRUB1	2	0.00243902	0.0100548	0.00340136	0	0	0	0.00347222	0	0.00268817	0.00571429	0.0514905	0.002	0.00201613	0.00381679	0	0.0294118	0	0.0425139
HRAS	0	0.00243902	0.0100548	0	0.0130435	0.01222	0.00189394	0	0.0151803	0.0107527	0.00190476	0.0135501	0	0.00201613	0.0229008	0.0148936	0.00534759	0.00197239	0.00924214
IPO7	0	0.00243902	0.0127971	0.00340136	0.0108696	0.00814664	0.00189394	0	0.00948767	0.0107527	0.00952381	0.0108401	0.016	0.00201613	0.019084	0.0170213	0.00534759	0.00197239	0.00369686
PEX16	0	0.00731707	0.0201097	0.0170068	0.0108696	0.0224033	0.00189394	0	0.0113852	0.00268817	0.00761905	0.0298103	0.018	0	0.0152672	0.0191489	0.0187166	0	0.0147874
SSSCA1	1	0.0146341	0.011883	0.0136054	0	0.0285132	0	0	0.0189753	0.00268817	0.0114286	0.0596206	0.016	0.00201613	0.00763359	0.0148936	0.0106952	0	0.0147874
CUL5	1	0.0146341	0.00914077	0.00340136	0.00434783	0.0101833	0	0.00347222	0.0246679	0.0107527	0.0133333	0.119241	0.014	0.00403226	0.0229008	0.012766	0.0106952	0	0.00184843
CD3E	2	0.0121951	0.00365631	0	0.00434783	0.01222	0.00189394	0	0.0322581	0.0134409	0.0209524	0.100271	0.01	0.00201613	0.019084	0.00425532	0.0240642	0	0.012939
MED21	13	0.0536585	0.0447898	0.0306122	0.0326087	0.0610998	0.0132576	0.0590278	0.028463	0.00806452	0.0666667	0.279133	0.128	0.00403226	0.0763359	0.0404255	0.0588235	0.00197239	0.0369686
C12orf10	2	0.0170732	0.00548446	0.0136054	0.0130435	0.00407332	0.0094697	0.0347222	0.00189753	0.0107527	0.0228571	0.0542005	0.01	0.00403226	0.0267176	0.00638298	0.013369	0.00394477	0.0166359
DNAJC14	4	0.0243902	0.00639854	0.0136054	0.0130435	0.00814664	0.0094697	0.0347222	0.00379507	0.0241935	0.0438095	0.0867209	0.014	0.00403226	0.0534351	0.0212766	0.0294118	0.00394477	0.0203327
PPP1R12A	2	0.0219512	0.0191956	0.00680272	0.0108696	0.00203666	0.0113636	0.0416667	0	0.0134409	0.0152381	0.0298103	0.018	0.00806452	0.0877863	0.012766	0.00802139	0.00591716	0.00554529
DENR	3	0.0243902	0.0127971	0.0136054	0.0108696	0.00610998	0.00378788	0.0451389	0.00948767	0.0107527	0.00952381	0.0596206	0.008	0.00403226	0.0343511	0.0148936	0.00802139	0.00394477	0.0147874
NUP58	5	0.0317073	0.0164534	0.00680272	0.341304	0.00407332	0.00378788	0.0138889	0	0.00806452	0.00190476	0.0298103	0.004	0.00604839	0.0305344	0.0574468	0.0534759	0	0.00369686
COG6	3	0.0146341	0.00731261	0.00680272	0.330435	0.00203666	0.00189394	0.0173611	0.00189753	0	0.00380952	0.0189702	0.004	0	0.00381679	0.0553191	0.0721925	0	0.00554529
TRAC	7	0.0292683	0.0393053	0.0442177	0.00434783	0.0570265	0.00757576	0	0.00948767	0.0188172	0.0571429	0.105691	0.046	0.00201613	0.0992366	0.0212766	0.0160428	0.00197239	0.0295749
G2E3	6	0.0097561	0.035649	0.0408163	0.00434783	0.0407332	0.00568182	0	0.0056926	0.016129	0.100952	0.0514905	0.028	0.00201613	0.0839695	0.00638298	0.0106952	0	0.0184843
EXOC5	3	0.00731707	0.0127971	0.037415	0	0.0407332	0.00189394	0	0	0.00268817	0.0247619	0.0189702	0.016	0	0.0305344	0	0.00802139	0	0.00924214
TRIP11	5	0.0097561	0.0137112	0.047619	0.00217391	0.0366599	0.00378788	0.00347222	0.00189753	0.00537634	0.0209524	0.0677507	0.042	0	0.0458015	0.00212766	0.0026738	0	0.0166359
IGHG2	7	0.0317073	0.0265082	0.037415	0.00869565	0.0570265	0.0170455	0.00694444	0.0056926	0.00537634	0.0304762	0.127371	0.074	0.0141129	0.0648855	0.00212766	0.00534759	0.00591716	0.0221811
PWAR5	1	0.0219512	0.0137112	0.0272109	0	0.00610998	0.00378788	0.00694444	0	0.00537634	0.00380952	0.0162602	0.012	0.0120968	0.0534351	0.0234043	0.00534759	0	0.00369686
BUB1B	1	0.0097561	0.00639854	0.00680272	0	0	0.00189394	0	0	0.00537634	0.00380952	0.00542005	0.002	0.00201613	0.0381679	0.0106383	0.0026738	0	0
ARPP19	1	0.00731707	0.00639854	0.00680272	0.00217391	0.00407332	0.00189394	0	0	0.00806452	0.00190476	0.00813008	0.002	0	0.0458015	0.0170213	0.00534759	0	0
NUBP2	3	0.00487805	0.160878	0.0272109	0.0173913	0.00814664	0.0094697	0.104167	0.00379507	0.0241935	0.0266667	0.0298103	0.01	0.00806452	0.0534351	0.012766	0.0026738	0.00394477	0.012939
CORO1A	5	0.0560976	0.158135	0.0204082	0.0478261	0.0101833	0.0094697	0.0972222	0	0.0188172	0.0247619	0.0352304	0.026	0.00201613	0.0229008	0.00851064	0.0160428	0	0.0295749
IGHV3OR16-9	6	0.0219512	0.134369	0.0170068	0.0282609	0.01222	0.0397727	0.09375	0.00189753	0.0188172	0.0342857	0.0325203	0.018	0.00403226	0.0305344	0.0106383	0.0106952	0.00394477	0.0184843
MT1E	1	0.0097561	0.00914077	0.0102041	0.023913	0.0142566	0.00568182	0.0902778	0.00948767	0.00268817	0.0190476	0.0216802	0.012	0.00403226	0.0152672	0.00851064	0.00534759	0	0.00924214
TMEM208	2	0.0317073	0.00457038	0.0136054	0.0217391	0.0142566	0.00378788	0.09375	0.00379507	0	0.0209524	0.00813008	0.014	0.00201613	0.00763359	0.012766	0.013369	0	0.00184843
APRT	2	0.0341463	0.0137112	0.0136054	0.0282609	0.0101833	0.0170455	0.0972222	0.00379507	0.00268817	0.0114286	0.0108401	0.02	0.00201613	0.0152672	0.00851064	0.0160428	0	0
PSMB6	2	0.00487805	0.00274223	0	0	0.00814664	0.00189394	0.0590278	0	0	0	0.0216802	0.002	0	0.0305344	0.0106383	0.0026738	0	0.00739372
AC060766.7	5	0.0585366	0.0466179	0.0136054	0.0282609	0.00203666	0.00189394	0.0902778	0.0056926	0.0645161	0.032381	0.00542005	0.028	0	0.00763359	0.0148936	0.0160428	0.00197239	0.00924214
HOXB6	11	0.0512195	0.102377	0.037415	0.0217391	0.00610998	0.00189394	0.100694	0.00759013	0.0860215	0.0457143	0.0731707	0.04	0.00806452	0.0381679	0.0489362	0.0240642	0.00197239	0.0425139
CLTC	13	0.0878049	0.16362	0.0442177	0.0347826	0.0162933	0.00189394	0.131944	0.0322581	0.134409	0.047619	0.0840108	0.048	0.00403226	0.0801527	0.0893617	0.0213904	0.00197239	0.0351201
GPS1	12	0.0731707	0.107861	0.0272109	0.0304348	0.0142566	0.00378788	0.107639	0.0303605	0.139785	0.0590476	0.157182	0.062	0.00403226	0.0839695	0.0829787	0.0213904	0.00197239	0.0573013
AP005131.6	9	0.0829268	0.0319927	0.0340136	0.00869565	0.0794297	0.00568182	0.0138889	0.0056926	0.0241935	0.0228571	0.0840108	0.038	0.00806452	0.0687023	0.0382979	0.040107	0	0.0295749
GADD45GIP1	1	0.00487805	0.00182815	0	0.00869565	0.00203666	0.00189394	0	0.0151803	0.00268817	0	0.00542005	0.006	0	0.0763359	0.00851064	0.0026738	0	0
POLR2I	10	0.0756098	0.0402194	0.0884354	0.026087	0.0224033	0.00378788	0	0.0151803	0.0430108	0.0419048	0.203252	0.14	0	0.0916031	0.0212766	0.0347594	0.00394477	0.0573013
ZNF420	10	0.0878049	0.0438757	0.085034	0.0217391	0.0203666	0.00568182	0	0.0170778	0.0322581	0.0514286	0.181572	0.142	0.00604839	0.0954198	0.0191489	0.0347594	0.00394477	0.0480591
NOSIP	5	0.0439024	0.0265082	0.0544218	0.0152174	0.0101833	0.00568182	0	0.0151803	0.0376344	0.00380952	0.0379404	0.022	0.00604839	0.0229008	0.012766	0.0320856	0.00394477	0.0240296
SIGLEC9	7	0.0560976	0.0301645	0.0646259	0.0152174	0.01222	0.00568182	0	0.0151803	0.0349462	0.00761905	0.0623306	0.032	0.00604839	0.0267176	0.012766	0.0427807	0.00394477	0.0221811
HSPBP1	7	0.0609756	0.0466179	0.0816327	0.0173913	0.0183299	0.00568182	0	0.0132827	0.0456989	0.0209524	0.0894309	0.04	0.0100806	0.019084	0.0148936	0.0454545	0.00394477	0.0277264
ZNF134	7	0.0634146	0.0429616	0.0782313	0.0152174	0.0142566	0.00757576	0	0.0151803	0.0430108	0.0171429	0.0840108	0.05	0.00806452	0.0229008	0.0191489	0.0427807	0.00394477	0.0240296
SNRPB	13	0.0707317	0.0539305	0.0782313	0.197826	0.0549898	0.0151515	0.0590278	0.0132827	0.0645161	0.0266667	0.284553	0.098	0.00201613	0.0458015	0.0595745	0.114973	0.00394477	0.0480591
ROMO1	14	0.139024	0.083181	0.132653	0.486957	0.0773931	0.0189394	0.0590278	0.0132827	0.0645161	0.032381	0.257453	0.104	0.00403226	0.0496183	0.119149	0.18984	0.00197239	0.0683919
MTG2	14	0.0926829	0.154479	0.0986395	0.493478	0.0468432	0.0208333	0.0659722	0.0227704	0.0913978	0.0990476	0.395664	0.076	0.00806452	0.114504	0.155319	0.251337	0.00197239	0.0961183
MORC3	4	0.0463415	0.0338208	0.0238095	0.00652174	0.00610998	0.00757576	0.00347222	0.0113852	0	0.0171429	0.0596206	0.006	0.00403226	0.0381679	0.0170213	0	0	0.0184843
THAP7	6	0.0658537	0.0137112	0.0136054	0.00869565	0.0590631	0.0132576	0	0.00759013	0.0134409	0.0190476	0.0758808	0.144	0	0.114504	0.0957447	0.0160428	0.00197239	0.0110906
IGLC2	6	0.0512195	0.0191956	0.0102041	0.00217391	0.0366599	0.0094697	0	0.00759013	0.0188172	0.0228571	0.0650407	0.116	0	0.0877863	0.0702128	0.00802139	0	0.00924214
ZMAT5	5	0.0585366	0.0164534	0.0204082	0.00434783	0.0183299	0.00568182	0	0.00759013	0.0241935	0.0114286	0.0731707	0.098	0	0.0343511	0.0404255	0.00802139	0	0.0203327
RAC2	3	0.0292683	0.0109689	0.0136054	0.00434783	0.0101833	0.00757576	0	0.00759013	0.0295699	0.00952381	0.0162602	0.074	0	0.0458015	0.0680851	0.0026738	0	0.00924214
SELENOO	4	0.00243902	0.0228519	0.0204082	0.00869565	0.0264766	0.0170455	0.00347222	0.0056926	0.0376344	0.00571429	0.0135501	0.086	0	0.0458015	0.087234	0.0160428	0	0.0147874

## Sheet: Del
	DelCount	BLCA	BRCA	CESC	COAD	HNSC	KIRC	KIRP	LGG	LIHC	LUAD	OV	LUSC	PRAD	SARC	SKCM	STAD	THCA	UCEC
UBE2J2	7	0.00243902	0.0283364	0.0136054	0.0304348	0.00610998	0.00568182	0.0416667	0.197343	0.129032	0.00571429	0.0650407	0.016	0.00403226	0.103053	0.0382979	0.013369	0.00394477	0.0221811
MIIP	8	0.00243902	0.0310786	0.0170068	0.0369565	0.00407332	0.00757576	0.0347222	0.218216	0.112903	0.00190476	0.0352304	0.006	0.00604839	0.0763359	0.0319149	0.0026738	0	0.012939
ERI3	3	0	0.0109689	0	0.00652174	0	0.00378788	0.0243056	0.204934	0.0591398	0	0.00813008	0	0.00201613	0.0305344	0.00425532	0.0026738	0.00197239	0
RNF11	2	0	0.0100548	0	0.00652174	0	0.00378788	0.0208333	0.206831	0.0537634	0	0.0108401	0.002	0.00604839	0.0267176	0.00212766	0.0026738	0	0.00184843
USP33	3	0	0.0127971	0	0.023913	0.00203666	0.00378788	0.0208333	0.237192	0.0403226	0.00571429	0.0216802	0.002	0.00604839	0.0381679	0.00638298	0	0	0
GBP1	3	0.00487805	0.0173675	0	0.0217391	0.00203666	0.00568182	0.0243056	0.240987	0.0430108	0.00571429	0.0271003	0.002	0.00806452	0.0381679	0.0170213	0.0026738	0	0.00184843
CD53	3	0	0.011883	0.00340136	0.026087	0.00814664	0.00568182	0.0243056	0.223909	0.0349462	0.00952381	0.0298103	0.022	0.00604839	0.0343511	0.0170213	0.00802139	0	0
VPS72	0	0	0	0	0	0	0.00189394	0.00694444	0	0	0	0	0	0	0.00763359	0	0	0	0
SPRR2D	0	0	0	0	0.00217391	0	0.00189394	0.00694444	0	0	0.00190476	0	0	0.00403226	0	0.00212766	0	0	0
FLAD1	0	0	0	0	0	0	0.00189394	0.00694444	0	0	0	0	0	0	0	0	0	0	0
SLAMF8	0	0	0	0	0	0	0.00189394	0.00694444	0	0	0	0	0	0.00806452	0	0	0	0	0
RAB3GAP2	1	0.00243902	0.00274223	0	0	0	0.0113636	0.0104167	0.00379507	0.0134409	0	0.0189702	0	0.00403226	0.0343511	0.00638298	0	0	0.00369686
IGKV3-11	0	0	0.00274223	0	0	0	0	0.00347222	0	0.00268817	0.00190476	0.00271003	0.002	0.00604839	0.00381679	0	0	0	0.00369686
PRPF40A	0	0.0146341	0.00457038	0.00680272	0.00217391	0	0	0.00347222	0.00189753	0.0188172	0	0.00271003	0	0.0141129	0.019084	0.00212766	0	0	0.00184843
PIKFYVE	2	0.0219512	0.00274223	0.0510204	0	0	0.00189394	0.00694444	0	0	0	0.00813008	0.002	0	0.0305344	0.00638298	0	0.00197239	0.00739372
PDCD6IP	2	0	0.00182815	0.0578231	0.00869565	0.0183299	0.0814394	0.0138889	0.0113852	0.00806452	0.00571429	0.0189702	0.016	0.00201613	0.0229008	0.012766	0.0026738	0	0.00739372
TEX264	3	0.0195122	0.0137112	0.0612245	0.0130435	0.0244399	0.0776515	0.0138889	0.0227704	0.0134409	0.00380952	0.0271003	0.024	0.00201613	0.0419847	0.0170213	0.00534759	0	0.00554529
APPL1	5	0.0170732	0.0164534	0.0680272	0.0108696	0.0264766	0.0549242	0.0138889	0.0227704	0.016129	0.00571429	0.0325203	0.03	0.00201613	0.0305344	0.00638298	0	0	0.0147874
TRAT1	0	0.00243902	0.00274223	0	0.00217391	0	0.0094697	0.00347222	0.0113852	0.00268817	0	0.00271003	0.002	0.00403226	0.0114504	0.0170213	0.0026738	0	0
EEFSEC	0	0.00731707	0.00457038	0	0	0	0.00568182	0.00347222	0.00948767	0.00537634	0	0.00271003	0	0	0.0152672	0.0255319	0	0	0
PIK3CA	0	0	0.000914077	0	0	0	0	0	0	0	0	0	0	0	0.0152672	0.0234043	0	0	0
PAK2	0	0	0.00182815	0	0.00217391	0	0	0.00347222	0.0208729	0	0.00761905	0.0162602	0	0.00806452	0.0229008	0.0191489	0	0	0
UBE2K	2	0.0146341	0.0127971	0.0612245	0.0152174	0.0101833	0.00189394	0.00347222	0.0208729	0.0215054	0.00761905	0.0731707	0.018	0.0100806	0.0114504	0.00638298	0.00534759	0	0.0110906
USO1	3	0	0.00365631	0.0238095	0.0130435	0.00203666	0	0.00347222	0.0341556	0.102151	0.00190476	0.0704607	0.004	0	0.0229008	0.00638298	0	0	0.00184843
DNAJB14	3	0.00731707	0.00822669	0.0238095	0.0130435	0.00203666	0	0.00694444	0.0322581	0.112903	0	0.168022	0.01	0.00201613	0.0152672	0.012766	0.0026738	0	0.0147874
C5orf22	0	0	0.000914077	0.00340136	0	0	0	0	0.0056926	0	0	0	0.002	0	0.00381679	0.0170213	0	0	0.00184843
POLK	3	0.0317073	0.0182815	0.0238095	0.0152174	0.00407332	0.00189394	0	0.00948767	0	0.0133333	0.192412	0.022	0.0322581	0.00381679	0.0234043	0.0240642	0	0.0240296
AFF4	2	0.0219512	0.0146252	0.0238095	0.023913	0.00203666	0.00189394	0	0.00759013	0.00806452	0.0133333	0.100271	0.02	0.0141129	0.00381679	0.0255319	0.0347594	0	0.0110906
HIST1H3H	1	0	0.00548446	0.0204082	0.00217391	0.00407332	0.00378788	0.0277778	0.0056926	0.00268817	0	0.0298103	0.002	0.00201613	0.0381679	0.00425532	0.0026738	0	0.00184843
HLA-B	1	0	0.00548446	0.0204082	0.00217391	0.00610998	0.00378788	0.0243056	0.00189753	0.00537634	0	0.0271003	0.004	0	0.0419847	0.00638298	0.00802139	0	0.00184843
HLA-DPB1	1	0.00243902	0.00365631	0.00340136	0.00434783	0.00203666	0	0.0138889	0	0	0	0.0135501	0	0	0.0419847	0.00638298	0.0026738	0	0.00184843
MEA1	1	0	0.00731261	0.0136054	0	0.00407332	0.00378788	0.0208333	0	0.00268817	0	0.0216802	0.002	0	0.0419847	0.0106383	0.0026738	0	0.00184843
CASP8AP2	7	0.0317073	0.0301645	0.0204082	0.00652174	0.00203666	0.00757576	0.0173611	0.0227704	0.102151	0.0171429	0.0596206	0	0.0604839	0.0305344	0.102128	0.0026738	0	0.00369686
LATS1	6	0.0268293	0.0374771	0.0306122	0.00652174	0.00814664	0.0170455	0.0208333	0.0436433	0.147849	0.0285714	0.149051	0.002	0.00201613	0.0152672	0.148936	0.00802139	0.00394477	0.00739372
BRAT1	1	0.00487805	0.0100548	0.00680272	0	0.00610998	0	0	0.0170778	0	0.00380952	0.135501	0.006	0.00604839	0.019084	0.00638298	0.0026738	0	0.0184843
KRIT1	0	0	0.00731261	0.0170068	0	0	0	0	0	0.0188172	0	0.0135501	0	0	0.0229008	0.00638298	0.0026738	0.00197239	0.00554529
POLR2J	0	0	0.00914077	0.0204082	0	0	0	0	0	0.0134409	0	0.00542005	0.002	0.00403226	0.0229008	0.00638298	0	0.00197239	0.00184843
AC018638.4	0	0.00243902	0.0100548	0.0272109	0	0.01222	0.00189394	0	0	0.0268817	0	0.0135501	0.004	0.0181452	0.0152672	0.00212766	0	0	0.00739372
TRBC1	2	0.00243902	0.0100548	0.0340136	0.00217391	0.0142566	0	0	0	0.0268817	0	0.00813008	0.006	0.00806452	0.0458015	0.00425532	0.00534759	0	0.0110906
GIMAP4	2	0.00731707	0.0137112	0.0408163	0.00434783	0.0203666	0	0	0	0.0268817	0.00190476	0.0189702	0.01	0.00403226	0.0534351	0.00851064	0.00534759	0	0.0147874
CCAR2	13	0.126829	0.137112	0.0714286	0.184783	0.0183299	0.0416667	0.0208333	0.00379507	0.360215	0.0571429	0.284553	0.048	0.145161	0.0534351	0.0617021	0.0294118	0	0.0924214
ASH2L	10	0.0487805	0.0319927	0.0272109	0.0673913	0.0162933	0.032197	0.0138889	0.0056926	0.27957	0.0190476	0.113821	0.004	0.102823	0.0343511	0.0489362	0.0160428	0	0.0499076
ARMC1	0	0.00243902	0	0.00340136	0.00217391	0.00203666	0.00568182	0.00347222	0.00379507	0.00537634	0	0	0	0	0.0152672	0	0	0	0
UTP23	0	0	0.000914077	0.00340136	0.00217391	0	0	0	0	0.00537634	0	0.0108401	0	0	0.019084	0	0	0.00197239	0.00184843
SHARPIN	1	0	0.00639854	0.00680272	0.0130435	0	0	0.00347222	0.0170778	0.00806452	0.00380952	0.0135501	0.002	0.00604839	0.0496183	0.00425532	0.00534759	0.00197239	0.00924214
STOML2	4	0.0560976	0.00457038	0.00340136	0.00434783	0.0101833	0.00189394	0.0138889	0.0208729	0.0295699	0.0133333	0.0433604	0.008	0.00201613	0.0419847	0.114894	0.013369	0	0.012939
UBQLN1	4	0.0780488	0.00457038	0.00340136	0.00217391	0	0	0.0173611	0.00759013	0.0295699	0.00571429	0.0514905	0.01	0	0.00763359	0.0680851	0	0.00394477	0.0351201
DPM2	3	0.0756098	0.00457038	0	0.00217391	0	0	0.0173611	0.0056926	0.0268817	0	0.0514905	0.01	0	0.019084	0.0765957	0	0.00394477	0.0277264
YME1L1	3	0.0097561	0.00182815	0.0136054	0.00217391	0.00814664	0.00378788	0.0173611	0.0493359	0.0107527	0	0.0108401	0.004	0.00403226	0.0687023	0.117021	0	0	0.00554529
VPS26A	3	0.0170732	0.00365631	0.0102041	0.00652174	0	0.00378788	0.0104167	0.0474383	0.0295699	0.00380952	0.0243902	0.014	0.00201613	0.129771	0.110638	0.0026738	0	0.00554529
MRPL43	5	0.0195122	0.00822669	0.0204082	0.0282609	0.00610998	0.00378788	0.0104167	0.0588235	0.0456989	0.00380952	0.0867209	0.014	0.016129	0.114504	0.114894	0.013369	0.00197239	0.0184843
TRUB1	5	0.0219512	0.00914077	0.0170068	0.00652174	0.00407332	0.00378788	0.0104167	0.0872865	0.0591398	0.00380952	0.0325203	0.008	0.00403226	0.0992366	0.119149	0.0026738	0.00197239	0.00924214
HRAS	7	0.0609756	0.0219378	0.0646259	0.00217391	0.0142566	0	0.00694444	0.0702087	0.0107527	0.00571429	0.130081	0.012	0.00201613	0.0572519	0.0319149	0.00534759	0.00197239	0.0332717
IPO7	4	0.0414634	0.00639854	0.0408163	0	0.00814664	0	0.0104167	0.0455408	0.00806452	0.00190476	0.0758808	0.002	0.00201613	0.019084	0.0212766	0.00534759	0.00197239	0.0184843
PEX16	3	0.0365854	0.00548446	0.0238095	0.00217391	0.00407332	0	0.0104167	0.0341556	0.00268817	0	0.0216802	0.004	0.0181452	0.0343511	0.0297872	0.0026738	0.00197239	0.00554529
SSSCA1	1	0.00243902	0.0109689	0	0.0130435	0	0	0.00347222	0	0.0215054	0	0.00542005	0.002	0	0	0.0319149	0.00534759	0.00394477	0.00554529
CUL5	7	0.0243902	0.0776965	0.115646	0.0108696	0.0407332	0	0.0277778	0.00189753	0.0403226	0.00380952	0.0514905	0.012	0.00604839	0.0725191	0.108511	0.00802139	0.00591716	0.0184843
CD3E	8	0.0365854	0.0776965	0.156463	0.0108696	0.0509165	0	0.0277778	0.00379507	0.0537634	0.00190476	0.0406504	0.018	0.00604839	0.0916031	0.131915	0.0106952	0.00591716	0.012939
MED21	2	0.00487805	0.00365631	0.0170068	0	0.00407332	0	0	0.00189753	0.0376344	0.00761905	0.0135501	0	0.0181452	0.0343511	0.00638298	0.00534759	0	0.00369686
C12orf10	0	0.00243902	0.00182815	0	0	0	0	0	0.0151803	0.00268817	0	0.00813008	0	0.00201613	0.0229008	0.0148936	0.0026738	0	0
DNAJC14	0	0.00243902	0.00274223	0	0	0	0	0	0.0113852	0.00268817	0	0.00271003	0	0.00201613	0.0114504	0.0106383	0.0026738	0	0
PPP1R12A	0	0.00243902	0.00274223	0.00340136	0.00869565	0	0	0	0.00948767	0.00537634	0	0.0243902	0	0	0.0114504	0.0170213	0.0106952	0	0.00184843
DENR	1	0.00487805	0.00365631	0	0.00217391	0	0	0	0.00379507	0.0215054	0.00380952	0.0379404	0.002	0.00806452	0.0114504	0.0234043	0.00534759	0	0.00369686
NUP58	6	0.00487805	0.0393053	0.0408163	0	0.00814664	0.00189394	0.00694444	0.0398482	0.0860215	0.00952381	0.116531	0.014	0.00806452	0.129771	0.0255319	0.0026738	0.00986193	0.0277264
COG6	9	0.0414634	0.059415	0.0612245	0.00652174	0.0183299	0.00378788	0.0104167	0.0455408	0.139785	0.00571429	0.149051	0.018	0.0987903	0.179389	0.0255319	0	0.00986193	0.0314233
TRAC	3	0.00243902	0.00731261	0.00340136	0.0369565	0.00814664	0.0151515	0.0243056	0.0151803	0.00537634	0.00380952	0.0352304	0.002	0	0.0305344	0.0148936	0	0	0.00184843
G2E3	2	0.0121951	0.00548446	0	0.0456522	0.00407332	0.0170455	0.0173611	0.0170778	0.0107527	0.00190476	0.0352304	0.004	0	0.0229008	0.0276596	0	0	0.00184843
EXOC5	6	0.0121951	0.0100548	0.00340136	0.0630435	0.00407332	0.0189394	0.0208333	0.0398482	0.0591398	0.00380952	0.0623306	0.004	0.00201613	0.0458015	0.0340426	0	0	0.00739372
TRIP11	7	0.0121951	0.0137112	0.0306122	0.0673913	0.01222	0.0208333	0.0208333	0.0588235	0.0752688	0.00190476	0.0813008	0.002	0.00806452	0.0610687	0.0446809	0.0026738	0	0.012939
IGHG2	6	0.0219512	0.0146252	0.0238095	0.0478261	0.0183299	0.0132576	0.0138889	0.0417457	0.061828	0.00952381	0.0487805	0.006	0.00604839	0.0496183	0.0404255	0.0213904	0	0.012939
PWAR5	3	0.0195122	0.0338208	0.0238095	0.0652174	0.00610998	0	0.0104167	0.0132827	0.0268817	0.0190476	0.127371	0.008	0.00806452	0.019084	0.0297872	0.0160428	0	0.0295749
BUB1B	4	0.0195122	0.0210238	0.0306122	0.0565217	0.00610998	0.00189394	0.0104167	0.0151803	0.0188172	0.0133333	0.146341	0.004	0.0100806	0.0152672	0.0638298	0.0106952	0.00591716	0.0277264
ARPP19	2	0.0097561	0.0137112	0.0272109	0.0347826	0.00610998	0.00189394	0.00694444	0.0151803	0.00806452	0.00761905	0.0894309	0.002	0.00403226	0.00763359	0.0234043	0.00802139	0.00394477	0.0277264
NUBP2	2	0.0243902	0.00731261	0.0136054	0.00869565	0.00814664	0	0	0	0.0752688	0.00571429	0.108401	0.01	0.00201613	0.0114504	0.00638298	0.0240642	0	0.0203327
CORO1A	2	0.00487805	0.00274223	0.00340136	0	0.00610998	0	0	0.00189753	0.0456989	0	0.0271003	0	0.00403226	0.0305344	0.00425532	0.00802139	0	0.0147874
IGHV3OR16-9	1	0.00487805	0.00182815	0.00680272	0.00217391	0.00610998	0	0	0	0.0376344	0	0.0216802	0	0.00201613	0.019084	0.00425532	0.0026738	0	0.012939
MT1E	8	0.0097561	0.0932358	0.0408163	0	0.0162933	0	0.00347222	0.00379507	0.11828	0.00952381	0.181572	0.016	0.0564516	0.110687	0.0638298	0.00802139	0	0.077634
TMEM208	7	0.00487805	0.083181	0.0238095	0	0.0142566	0	0.00347222	0.00189753	0.115591	0.00380952	0.216802	0.008	0.0544355	0.0877863	0.0468085	0.0026738	0.00197239	0.0573013
APRT	8	0.0268293	0.125229	0.0646259	0.00434783	0.0244399	0.00189394	0.0243056	0.00759013	0.163978	0.0266667	0.292683	0.022	0.104839	0.133588	0.0829787	0.0187166	0.00394477	0.120148
PSMB6	10	0.0512195	0.0575868	0.0646259	0.136957	0.0101833	0.00378788	0.0138889	0	0.263441	0.0114286	0.159892	0.018	0.0302419	0.103053	0.0595745	0.0187166	0.00591716	0.0443623
AC060766.7	3	0.0121951	0.0255941	0.00340136	0.0152174	0.00814664	0.0113636	0.00347222	0.0113852	0.00806452	0.00952381	0.233062	0.024	0.0120968	0.0419847	0.0191489	0.0026738	0.00394477	0.0443623
HOXB6	1	0	0.00731261	0	0.00869565	0	0	0	0	0	0.00190476	0.0596206	0.002	0.00201613	0.00381679	0.0212766	0	0	0.0184843
CLTC	1	0	0.00182815	0	0.00434783	0	0	0	0	0	0	0.0406504	0.002	0	0.00381679	0.00851064	0.0026738	0	0.012939
GPS1	3	0	0.00731261	0.0340136	0.00217391	0.0101833	0	0	0.00189753	0.00268817	0	0.0352304	0.002	0.00201613	0.0343511	0.012766	0.0026738	0	0.0110906
AP005131.6	4	0.0121951	0.0146252	0.0238095	0.15	0.00407332	0.00378788	0.0381944	0.0151803	0.0268817	0.00761905	0.0704607	0.004	0.0141129	0.0305344	0.0234043	0.0106952	0.00394477	0.0110906
GADD45GIP1	0	0.00487805	0.00182815	0.0102041	0.00434783	0	0.00189394	0	0	0.016129	0.0114286	0.0135501	0.004	0	0	0.00212766	0	0.00197239	0.00369686
POLR2I	1	0.00243902	0	0.00680272	0	0.00203666	0	0	0.1537	0.00268817	0.00380952	0.0216802	0.002	0.00201613	0.0152672	0.00212766	0.0026738	0	0.00184843
ZNF420	1	0.00243902	0	0.0102041	0	0.00407332	0	0	0.157495	0.00537634	0.00190476	0.0216802	0.002	0.00201613	0.019084	0.00212766	0.00534759	0	0.00554529
NOSIP	3	0.00243902	0.00274223	0.0136054	0	0	0	0.00347222	0.214421	0.016129	0.00952381	0.0813008	0.004	0	0.0534351	0.00425532	0.00534759	0	0.0147874
SIGLEC9	3	0.00243902	0.000914077	0.0170068	0.00217391	0	0	0.00347222	0.229602	0.0134409	0.00952381	0.0840108	0.004	0	0.0610687	0.00851064	0.00534759	0	0.0166359
HSPBP1	3	0.00243902	0.00182815	0.0136054	0.00217391	0.00203666	0	0.00347222	0.250474	0.016129	0.00952381	0.0867209	0.004	0	0.0572519	0.00851064	0.00534759	0	0.012939
ZNF134	3	0.00243902	0.00365631	0.0136054	0.00434783	0.00407332	0	0	0.256167	0.016129	0.0114286	0.119241	0.008	0	0.0687023	0.0106383	0.00802139	0	0.0147874
SNRPB	2	0.00487805	0.0109689	0.0136054	0.0369565	0	0.00189394	0	0.0056926	0.0241935	0.0114286	0.0108401	0.004	0.00201613	0.0610687	0.0212766	0	0	0.00924214
ROMO1	0	0	0.00274223	0	0	0	0	0	0	0	0.00190476	0.00542005	0	0.00201613	0.00763359	0	0	0	0
MTG2	0	0	0.00182815	0.00680272	0	0.00407332	0	0	0	0	0.00190476	0.00813008	0	0.00201613	0.0152672	0	0	0	0.00369686
MORC3	3	0.0097561	0.00274223	0.0170068	0.0217391	0.00407332	0.0094697	0.0520833	0.00189753	0.0510753	0.00380952	0.0352304	0.006	0.00201613	0.0114504	0.0234043	0.026738	0	0.00369686
THAP7	4	0.00731707	0.0292505	0.0102041	0.026087	0	0.00189394	0.0590278	0.00759013	0.0268817	0.00952381	0.157182	0.004	0.00604839	0.0381679	0.012766	0.00802139	0.0532544	0.0277264
IGLC2	6	0.0121951	0.0246801	0.0136054	0.0282609	0	0.00189394	0.0555556	0.0132827	0.0349462	0.00761905	0.162602	0.008	0.00806452	0.0458015	0.0170213	0.00534759	0.0571992	0.0314233
ZMAT5	6	0.00731707	0.0274223	0.0102041	0.0282609	0.00203666	0.00189394	0.0555556	0.0170778	0.0349462	0.00571429	0.146341	0.002	0.00806452	0.0610687	0.0361702	0.00534759	0.0729783	0.0184843
RAC2	7	0.0146341	0.0329068	0.0136054	0.0304348	0.00203666	0	0.0590278	0.0208729	0.0268817	0.00952381	0.211382	0.004	0.00403226	0.0534351	0.0212766	0.00802139	0.0749507	0.0406654
SELENOO	13	0.0365854	0.0557587	0.037415	0.0434783	0.00407332	0	0.0625	0.0303605	0.0564516	0.0342857	0.460705	0.024	0.0100806	0.125954	0.0361702	0.0240642	0.0729783	0.0961183
