# Supplementary material for: Pan-cancer driver copy number alterations identified by joint expression/CNA data analysis
Source: Sci Rep. 2020 Oct 14;10:17199. doi: 10.1038/s41598-020-74276-6 (PMC7566486; doi:10.1038/s41598-020-74276-6)
Supplement: Supplementary file 6 — Supplementary file6 [file 41598_2020_74276_MOESM6_ESM.xlsx]

## Sheet: Sheet1
Table S5. Co-amplification or co-deletion frequency of adjacent genomically co-localized signatures.
	Pancancer	BLCA	BRCA	CESC	COAD	HNSC	KIRC	KIRP	LGG	LIHC	LUAD	OV	LUSC	PRAD	SARC	SKCM	STAD	THCA	UCEC
UBE2J2 MIIP	0.703103	0.707317	0.71755	0.663265	0.654348	0.753564	0.704545	0.784722	0.776091	0.709677	0.674286	0.523035	0.64	0.832661	0.625954	0.719149	0.692513	0.715976	0.676525
VPS72 FLAD1	0.915726	0.826829	0.878428	0.94898	0.963043	0.961303	0.998106	0.986111	0.981025	0.88172	0.872381	0.720867	0.914	0.929435	0.847328	0.93617	0.930481	0.996055	0.89464
FLAD1 RAB3GAP2	0.79772	0.660976	0.707495	0.846939	0.923913	0.88391	0.945076	0.96875	0.931689	0.758065	0.71619	0.447154	0.732	0.846774	0.583969	0.780851	0.76738	0.994083	0.822551
PIK3CA PAK2	0.862717	0.873171	0.850091	0.897959	0.886957	0.85947	0.982955	0.975694	0.907021	0.903226	0.855238	0.558266	0.632	0.875	0.801527	0.910638	0.855615	0.996055	0.879852
KRIT1 POLR2J	0.908204	0.895122	0.896709	0.942177	0.941304	0.90835	0.979167	0.951389	0.944972	0.930108	0.908571	0.734417	0.844	0.951613	0.839695	0.910638	0.834225	0.99211	0.892791
ARMC1 UTP23	0.761754	0.67561	0.657221	0.833333	0.834783	0.727088	0.918561	0.979167	0.857685	0.669355	0.697143	0.341463	0.622	0.842742	0.740458	0.83617	0.692513	0.994083	0.850277
UTP23 SHARPIN	0.77574	0.739024	0.734918	0.758503	0.741304	0.824847	0.880682	0.899306	0.874763	0.806452	0.733333	0.395664	0.692	0.870968	0.652672	0.844681	0.716578	0.921105	0.789279
TMEM208 APRT	0.763282	0.702439	0.785192	0.680272	0.797826	0.837067	0.873106	0.868056	0.893738	0.774194	0.740952	0.560976	0.712	0.72379	0.706107	0.721277	0.735294	0.820513	0.689464
CLTC GPS1	0.856488	0.834146	0.732176	0.85034	0.913043	0.861507	1	0.979167	0.956357	0.88172	0.84	0.607046	0.764	0.953629	0.732824	0.912766	0.842246	0.998028	0.826248
POLR2I ZNF420	0.92031	0.87561	0.922303	0.918367	0.932609	0.955193	0.994318	0.986111	0.948767	0.954301	0.895238	0.650407	0.856	0.971774	0.805344	0.968085	0.925134	1	0.907579
HSPBP1 ZNF134	0.947931	0.907317	0.918647	0.955782	0.980435	0.947047	0.998106	0.993056	0.982922	0.994624	0.950476	0.823848	0.9	0.981855	0.835878	0.97234	0.957219	0.998028	0.942699
MTG2 SELENOO	0.465209	0.317073	0.316271	0.370748	0.234783	0.486762	0.765152	0.503472	0.73814	0.5	0.318095	0.0596206	0.348	0.798387	0.389313	0.489362	0.283422	0.753452	0.597043
