# Supplementary material for: Pan-cancer driver copy number alterations identified by joint expression/CNA data analysis
Source: Sci Rep. 2020 Oct 14;10:17199. doi: 10.1038/s41598-020-74276-6 (PMC7566486; doi:10.1038/s41598-020-74276-6)
Supplement: Supplementary file 7 — Supplementary file7 [file 41598_2020_74276_MOESM7_ESM.xlsx]

## Sheet: Ref 18
Table S6. Signatures located on CNVs identified in Ref. 18 and 19.
A) Amplification
Rank	Chromosome and band	Peak region	GISTIC q value*	# genes	GLA
1	8q24.21	chr8:128774432-128849112	2.723e-120	1	MYC
2	11q13.2	chr11:69098089-69278404	3.1632e-108	3	CCND1
3	17q12	chr17:35067383-35272328	2.6794e-92	6	PGAP3, MIEN, STARD3, ERBB2
4	12q14.1	chr12:56419524-56488685	1.4245e-72	7	METTL1, TSFM
5	14q13.3	chr14:35708407-36097605	6.1134e-51	3	NKX2-1, NKX2-1-AS1, SFTA3
6	12q15	chr12:67440273-67566002	7.768e-49	1	YEATS4, CCT2, CAND1, NUP107, FRS2
7	7p11.2	chr7:54899301-55275419	2.4149e-48	1	EGFR
8	1q21.2	chr1:148661965-149063439	1.4392e-39	9	VPS72, PSMD4, PSMB4, MRPL9, TARS2
9	8p12	chr8:38252951-38460772	1.558e-35	3	FGFR1
10	12p12.1	chr12:25189655-25352305	3.5178e-30	2	KRAS
11	19q12	chr19:34975531-35098303	2.656e-28	1	CCNE1
12	22q11.21	chr22:19172385-19746441	3.7083e-26	11	CRKL
13	12q15	chr12:68249634-68327233	2.6998e-24	2	YEATS4, CCT2, CAND1, NUP107, FRS2
14	12q14.3	chr12:64461446-64607139	3.5327e-22	1	HMGA2
15	Xq28	chrX:152729030-154913754	1.8623e-17	53	Removed
16	5p15.33	chr5:1212750-1378766	2.5667e-16	3	TERT
17	3q26.2	chr3:170024984-173604597	9.5955e-15	22	PHC3, PRKCI
18	15q26.3	chr15:96891354-97698742	2.1285e-14	4	IGF1R
19	20q13.2	chr20:51603033-51989829	9.6838e-14	1	ZNF217
20	8p11.21	chr8:42006632-42404492	5.7593e-12	6	PLAT
21	1p34.2	chr1:39907605-40263248	6.2919e-12	7	MYCL
22	17q21.33	chr17:44673157-45060263	2.2563e-11	4	PHB, SLC35B1
23	2p24.3	chr2:15977811-16073001	8.6403e-11	1	MYCN
24	7q21.3	chr7:89924533-98997268	3.0283e-10	62	KRIT1, ANKIB1, PEX1, AKAP9, VPS50
25	13q34	chr13:108477140-110084607	1.0654e-09	4	IRS2
26	11q14.1	chr11:76699529-78005085	2.0296e-08	14	ALG8, NARS2, CLNS1A
27	20q13.33	chr20:61329497-62435964	3.8999e-08	38	MTG2, ADRM1, ARFGAP1, UCKL1, OGFR, ARFRP1, ZGPAT
28	17q23.1	chr17:55144989-55540417	1.8487e-07	5	CLTC, INTS2, APPBP2, TRIM37, MED13, DCAF7, CCDC47, SMG8
29	1p12	chr1:119996566-120303234	2.5611e-07	5	REG4
30	8q21.13	chr8:81242335-81979194	2.9388e-07	3	ZBTB10
31	6p21.1	chr6:43556800-44361368	4.4517e-07	18	MEA1, KLHDC3, POLR1C, PPP2R5D, MAD2L1BP, YIPF3, MRPL2, RRP36, MRPL14, BYSL, TJAP1
32	5p11	chr5:45312870-49697231	8.183e-07	0
33	20q11.21	chr20:29526118-29834552	2.9277e-06	5	BCL2L1
34	6q23.3	chr6:135561194-135665525	3.1211e-06	1	MYB
35	1q44	chr1:241364021-247249719	3.9484e-06	71	DESI2, ADSS
36	5q35.3	chr5:174477192-180857866	5.9067e-06	92	CANX, CNOT6
37	7q31.2	chr7:115981465-116676953	6.3239e-06	3	MET
38	18q11.2	chr18:17749667-22797232	1.6663e-05	21	CABLES1
39	17q25.1	chr17:70767943-71305641	3.5769e-05	13	MRPS7, TSEN54, SAP30BP, MRPL58, NT5C
40	1p32.1	chr1:58658784-60221344	6.0526e-05	7	JUN
41	17q11.2	chr17:24112056-24310787	0.00010957	5	ERAL1, TRAF4
42	17p11.2	chr17:18837023-19933105	0.00013987	12	MAPK7
43	8q24.11	chr8:116186189-120600761	0.0001523	13	NOV
44	12q15	chr12:66458200-66543552	0.00019383	0
45	19q13.2	chr19:43177306-45393020	0.00021673	60	ZNF574, DMAC2, GSK3A, XRCC1, EXOSC5
46	11q22.2	chr11:101433436-102134907	0.00030157	8	TMEM123, YAP1
47	4q12	chr4:54471680-55980061	0.00042461	7	KDR
48	12p11.21	chr12:30999223-32594050	0.00050814	9	MED21, FGFR1OP2, MRPS35, ERGIC2, INTS13
49	3q28	chr3:178149984-199501827	0.00053577	143	PIK3CA, PHC3, PRKCI, MFN1, TBL1XR1
50	1p36.33	chr1:1-5160566	0.00067289	77	LRRC47, WRAP73
51	17q24.2	chr17:62318152-63890591	0.0018558	12	BPTF, HELZ
52	1q23.3	chr1:158317017-159953843	0.0019461	52	NCSTN, COPA
53	1q24.3	chr1:169549478-170484405	0.0020798	6	MYOC
54	8q22.3	chr8:101163387-103693879	0.0021504	14	AZIN1
55	13q31.3	chr13:89500014-93206506	0.0021504	3	GPC5
56	12q21.1	chr12:70849987-70966467	0.0025595	0
57	12p13.33	chr12:1-1311104	0.0026252	10	KDM5A, ERC1, WNK1
58	12q21.2	chr12:76852527-77064746	0.0036332	0
59	1q32.1	chr1:201678483-203358272	0.0036911	21	ZC3H11A, PPP1R15B, ZBED6
60	19q13.42	chr19:59066340-59471027	0.0039951	19	HSPBP1, ZNF865, ZNF579, ZNF787, EPN1, FIZ1, ZNF444, ZNF524, ZNF580, ZNF784, RPL28, ZNF581
61	12q12	chr12:38788913-42596599	0.0045318	12	SCAF11, TWF1, PUS7L, ARID2
62	12q23.1	chr12:95089777-95350380	0.007229	2	ELK3
63	12q21.32	chr12:85072329-85674601	0.0093561	0
64	10q22.3	chr10:74560456-82020637	0.011564	46	SFTPA1
65	3p11.1	chr3:86250885-95164178	0.015575	8	ZNF654, CGGBP1, C3orf38
66	17q11.1	chr17:22479313-22877776	0.020696	1	WSB1
67	8q24.3	chr8:140458177-146274826	0.022486	97	SHARPIN, CYHR1, HSF1, VPS28, BOP1, HGH1, EXOSC4, COMMD5, ZC3H3, DGAT1, ADCK5, MAF1, FBXL6, PUF60, SLC52A2, PPP1R16A, PYCR3, GPAA1, GLI4, LRRC14
68	Xq12	chrX:66436234-67090514	0.033377	1	removed
69	6q12	chr6:63255006-65243766	0.049952	3	PTP4A1
70	14q11.2	chr14:1-23145193	0.053928	95	PSMB5, C14orf119
71	9q34.3	chr9:137859478-140273252	0.076287	76	SSNA1, DPM2, EDF1, RABL6, PTGES2, PMPCA, SURF2, SPOUT1, ASB6, ZMYND19, URM1, NELFB, ZDHHC12, PAXX, MRPL41, ANAPC2, PHPT1, UCK1, MRPS2, REXO4
72	6p24.1	chr6:1-23628840	0.086057	95	NUP153, DEK, KDM1B
73	13q12.2	chr13:1-40829685	0.12049	110	MIR621, SLC25A15
74	12q21.1	chr12:72596017-73080626	0.12326	0
75	14q32.33	chr14:106074644-106368585	0.14057	0
76	11p13	chr11:32027116-37799354	0.15698	35	WT1
B) Deletion
Rank	Chromosome and band	Peak region	GISTIC q value*	# genes
1	9p21.3	chr9:21489625-22474701	0	5	CDKN2A
2	3p14.2	chr3:58626894-61524607	2.4E-314	2	FHIT
3	16q23.1	chr16:76685816-78205652	1.3964e-176	2	WWOX
4	9p24.1	chr9:7161607-12713130	1.0064e-83	3	PTPRD
5	20p12.1	chr20:14210829-15988895	9.6916e-74	2	MACROD2
6	6q26	chr6:161612277-163134099	8.126e-65	1	PRKN
7	13q14.2	chr13:46362859-48209064	3.8975e-63	8	COG6, COG3, AKAP11, ELF1, FNDC3A, GPALPP1, VPS36, ZC3H13, UTP14C
8	2q22.1	chr2:138479322-143365272	1.0995e-60	3	LRP1B
9	4q35.2	chr4:186684565-191273063	1.4434e-58	15	RNA5SP174
10	5q11.2	chr5:57754754-59053198	1.5225e-55	5	PLK2
11	16p13.3	chr16:5062786-7709383	4.975e-49	2	RBFOX1
12	7q34	chr7:141592807-142264966	7.395e-43	3
13	2q37.3	chr2:241477619-242951149	7.0258e-37	19	STK25, ATG4B, ING5, THAP4
14	19p13.3	chr19:1-526082	1.1282e-36	10	CDC34, POLRMT, RNF126
15	10q23.31	chr10:89467202-90419015	1.1382e-30	4	ATAD1, PTEN
16	8p23.2	chr8:2053441-6259545	4.0961e-28	1	CSMD1
17	1p36.31	chr1:3756302-6867390	2.8395e-26	23	LRRC47, WRAP73
18	4q22.1	chr4:91089383-93486891	6.4827e-24	2	CCSER1
19	18q23	chr18:75796373-76117153	5.6258e-22	4	PARD6G
20	6p25.3	chr6:1543157-2570302	7.6435e-19	2	FOXC1
21	19q13.43	chr19:63402921-63811651	7.1265e-18	17	ZNF134, ZNF304, ZNF551, ZNF776, ZNF17
22	Xp21.2	chrX:31041721-34564697	1.2212e-16	2	Removed
23	11q25	chr11:130280899-134452384	2.7298e-16	12	NTM
24	13q12.11	chr13:1-23902184	1.2605e-15	29	LATS2
25	22q13.33	chr22:45488286-49691432	8.7999e-15	38	SELENOO, TRABD, HDAC10, LMF2, NCAPH2, SCO2
26	15q11.2	chr15:1-24740084	2.9781e-14	20	CXADRP2
27	22q11.22	chr22:20517661-21169423	3.137e-14	3	IGLV1-51, etc.
28	10q26.3	chr10:129812260-135374737	8.4338e-13	35	ZNF511, ECHS1
29	12p13.2	chr12:11410696-12118386	1.8849e-12	2	ETV6
30	8p23.3	chr8:1-392555	5.991e-11	2	FBXO25
31	1p36.11	chr1:26377344-27532551	3.9625e-10	24	GPATCH3, NUDC, TMEM222, GPN2
32	11p15.5	chr11:1-1391954	1.5793e-09	49	HRAS, TSSC4, MOB2, POLR2L, PTDSS2, MRPL23, PSMD13
33	17q11.2	chr17:26185485-27216066	2.3355e-09	10	NF1
34	11q23.1	chr11:107086196-116175885	3.4716e-09	61	CUL5, NPAT, TMEM123, YAP1, BIRC2
35	9p24.3	chr9:1-708871	1.1271e-08	5	FOXD4
36	10q11.23	chr10:52313829-53768264	6.3831e-08	4	PRKG1
37	15q15.1	chr15:35140533-43473382	9.4099e-08	109	TP53BP1, ZSCAN29, UBR1
38	1p13.2	chr1:110339388-119426489	1.0852e-07	81	RSBN1, TRIM33, HIPK1
39	Xp22.33	chrX:1-3243111	4.2936e-07	21	Removed
40	3p26.3	chr3:1-2121282	1.1004e-06	2	CHL1
41	9p13.2	chr9:36365710-37139941	1.1455e-06	2	PAX5
42	17p13.1	chr17:7471230-7717938	2.1935e-06	10	TP53
43	12q24.33	chr12:131913408-132349534	2.3779e-06	7	FBRSL1
44	7q36.3	chr7:156893473-158821424	2.4779e-06	7	PTPRN2
45	6q16.1	chr6:76630464-105342994	5.3516e-06	76	CASP8AP2, SYNCRIP, MAP3K7, ZNF292, RNGTT
46	5q21.1	chr5:85837489-133480433	7.0047e-06	142	WDR36, YTHDC2, APC
47	8p11.22	chr8:39008109-41238710	9.1569e-06	7	TCIM
48	19q13.32	chr19:52031294-53331283	1.1795e-05	25	INAFM1, TMEM160
49	10p15.3	chr10:1-1042949	1.3178e-05	4	TUBB8
50	1p31.1	chr1:71284749-74440273	3.9697e-05	4	NEGR1
51	13q31.3	chr13:92308911-94031607	6.2306e-05	2	GPC6
52	16q11.2	chr16:31854743-53525739	7.6596e-05	37	RBL2, CHD9
53	20p13	chr20:1-325978	7.6596e-05	10	SOX12
54	5q35.3	chr5:177541057-180857866	0.00017235	43	HEIH, LINC00847
55	1q43	chr1:223876038-247249719	0.00036622	173	HEATR1, TOMM20, MTR, ARID4B
56	16p13.3	chr16:1-359092	0.0011744	16	NUBP2, GFER, TBL3, NARFL, MRPS34, E4F1, TSR3
57	17q21.2	chr17:37319013-37988602	0.0016502	22	CNP
58	2p25.3	chr2:1-15244284	0.0017511	51	MYT1L
59	3q13.31	chr3:116900556-120107320	0.0018943	1	LSAMP
60	7q21.11	chr7:65877239-79629882	0.0064074	73	BUD23, NSUN5, ABHD11
61	7q35	chr7:144118814-148066271	0.011715	3	CNTNAP2
62	14q32.12	chr14:80741860-106368585	0.01443	154	TRIP11, GOLGA5, BTBD7, PPP4R3A, ZC3H14
63	16q24.3	chr16:88436931-88827254	0.01479	9	APRT, CTU2, MVD, TRAPPC2L, KLHDC4, COX4I1, CHMP1A, VPS9D1
64	3q26.31	chr3:175446835-178263192	0.02659	1	NAALADL2
65	17q25.3	chr17:78087533-78774742	0.02659	8	ZNF750
66	19p12	chr19:21788507-34401877	0.02659	12	ZNF730, AC074135.1
67	12q23.1	chr12:97551177-99047626	0.032373	3	UHRF1BP1L, SCYL2, APAF1
68	4p16.3	chr4:1-435793	0.038834	4	TMEM175, GAK
69	18p11.32	chr18:1-587750	0.045042	4	COLEC12
70	2q33.2	chr2:204533830-206266883	0.051622	1	PARD3B
71	8p21.2	chr8:22125332-30139123	0.055508	63	CCAR2, CHMP7, ELP3, CCDC25, INTS9
72	8q11.22	chr8:42971602-72924037	0.068116	86	LYPLA1, TCEA1, RB1CC1
73	16q23.3	chr16:80759878-82408573	0.087914	2	CDH13
74	11q14.1	chr11:82612034-85091467	0.091593	6	DLG2
75	14q23.3	chr14:65275722-67085224	0.12205	7	VTI1B, ATP6V1D
76	7p22.2	chr7:3046420-4279470	0.12464	1	SDK1
77	13q34	chr13:111767404-114142980	0.12955	25	CUL4A, TUBGCP3, PCID2
78	17p12	chr17:10675416-12635879	0.13369	5	MAP2K4
79	21q22.2	chr21:38584860-42033506	0.18563	19	B3GALT5, B3GALT5-AS1, AF064860.2
80	18q21.2	chr18:46172638-49935241	0.20352	7	DCC
81	6q22.1	chr6:101000242-121511318	0.23	87	GTF3C6, RPF2
82	14q11.2	chr14:1-29140968	0.2457	140	CHD8, SUPT16H, TOX4

## Sheet: Ref 19
A) Amplification
Peak Name	Rank	Genomic location	Peak region	GISTIC q-value	Gene count	GLA
CCND1	1	11q13.3	chr11:69464719-69502928	2.05e-278	2	CCND1
EGFR	2	7p11.2	chr7:55075808-55093954	2.3e-240	1	EGFR
MYC	3	8q24.21	chr8:128739772-128762863	6.5e-180	1	MYC
TERC	4	3q26.2	chr3:169389459-169490555	5.4e-117	2	TERC
ERBB2	5	17q12	chr17:37848534-37877201	1.59e-107	1	PGAP3, MIEN, STARD3, ERBB2
CCNE1	6	19q12	chr19:30306758-30316875	4.77e-90	1	CCNE1
MCL1	7	1q21.3	chr1:150496857-150678056	1.25e-80	6	VPS72, PSMD4, PSMB4, MRPL9, TARS2
MDM2	8	12q15	chr12:69183279-69260755	2.59e-62	2	YEATS4, CCT2, CAND1, NUP107, FRS2
INTS4	9	11q14.1	chr11:77610143-77641464	1.01e-54	1	INTS4
WHSC1L1	10	8p11.23	chr8:38191804-38260814	3.43e-46	2	ASH2L, BAG4, PLPBP, DDHD2, LSM1, ERLIN2, NSD3
CDK4	11	12q14.1	chr12:58135797-58156509	5.14e-41	5	METTL1, TSFM
KAT6A	12	8p11.21	chr8:41751300-41897859	2.97e-39	2	VDAC3, GOLGA7
SOX2	13	3q26.33	chr3:181151312-181928394	1.21e-38	2	SOX2
PDGFRA	14	4q12	chr4:54924794-55218386	1.08e-37	3	PDGFRA
BDH1	15	3q29	chr3:197212101-197335320	1.21e-31	1	PAK2, UBXN7, ACAP2, DLG1, FYTTD1
1q44	16	1q44T	chr1:242979907-249250621	4.48e-31	83	DESI2, ADSS
MDM4	17	1q32.1	chr1:204367383-204548517	1.98e-29	3	ZC3H11A, PPP1R15B, ZBED6
TERT	18	5p15.33	chr5:1287704-1300024	9.34e-27	1	TERT
KDM5A	19	12p13.33T	chr12:1-980639	1.59e-25	11	KDM5A, ERC1, WNK1
MYCL1	20	1p34.2	chr1:40317971-40417342	3.99e-25	2	MYCL
IGF1R	21	15q26.3	chr15:98667475-100292401	8.62e-25	9	IGF1R
PARP10	22	8q24.3	chr8:144925436-145219779	5.44e-20	15	SHARPIN, CYHR1, HSF1, VPS28, BOP1, HGH1, EXOSC4, COMMD5, ZC3H3, DGAT1, ADCK5, MAF1, FBXL6, PUF60, SLC52A2, PPP1R16A, PYCR3, GPAA1, GLI4, LRRC14
G6PD	23	Xq28	chrX:153760870-153767853	3.66e-19	1	Removed
PHF12	24	17q11.2	chr17:27032828-27327946	1.75e-16	21	ERAL1, TRAF4
20q13.33	25	20q13.33	chr20:62187847-62214354	2.96e-16	2	MTG2, ADRM1, ARFGAP1, UCKL1, OGFR, ARFRP1, ZGPAT
PAF1	26	19q13.2	chr19:39699366-39945515	1.66e-15	13	ZNF574, DMAC2, GSK3A, XRCC1, EXOSC5
BCL2L1	27	20q11.21	chr20:30179028-30320705	2.85e-15	4	ROMO1, DYNLRB1, ERGIC3, RALY, PIGU, EIF6
TUBD1	28	17q23.1	chr17:57922443-57946458	7.19e-15	1	CLTC, INTS2, APPBP2, TRIM37, MED13, DCAF7, CCDC47, SMG8
[ZNF703]	29	8p11.23	chr8:37492669-37527108	2.44e-14	0
1q23.3	30	1q23.3	chr1:160949115-161115281	7.73e-13	9
8q22.2	31	8q22.2	chr8:101324079-101652657	4.22e-11	3	SNX31
BRD4	32	19p13.12	chr19:15310246-15428182	5.04e-10	3	NOTCH3
KRAS	33	12p12.1	chr12:24880663-25722878	9.47e-10	7	KRAS
NKX2-1	34	14q13.2	chr14:35587755-37523513	1.33e-09	14	NKX2-1, NKX2-1-AS1, SFTA3
NFE2L2	35	2q31.2	chr2:178072322-178171101	5.48e-09	5	NFE2L2
ZNF217	36	20q13.2	chr20:52148496-52442225	5.83e-08	1	ZNF217
13q34	37	13q34T	chr13:108818892-115169878	6.28e-08	45	IRS2
KAT6B	38	10q22.2	chr10:76497097-77194071	1.41e-07	9	SFTPA1
NSD1	39	5q35.3	chr5:176337344-177040112	1.75e-06	22	CANX, CNOT6
FGFR3	40	4p16.3	chr4:1778797-1817427	2.14e-06	2	FGFR3
9p13.3	41	9p13.3	chr9:35652385-35739486	2.55e-06	8
COX18	42	4q13.3	chr4:73530210-74658151	2.68e-06	7	COX18
7q36.3	43	7q36.3T	chr7:153768037-159138663	3.19e-06	30	PTPRN2
18q11.2	44	18q11.2	chr18:23857484-24119078	3.83e-06	2
SOX17	45	8q11.23	chr8:55069781-55384342	2.02e-05	1	SOX17
11q22.2	46	11q22.2	chr11:102295593-102512085	0.00015337	3	TMEM123, YAP1
CBX8	47	17q25.3	chr17:77770110-77795534	0.00023029	1	GPS1, ANAPC11, DUS1L, RFNG, OXLD1, MRPL12, LRRC45, CENPX, ASPSCR1, CCDC137, FAAP100, CEP131, MCRIP1, DCXR, PCYT2, SIRT7
AKT1	48	14q32.33	chr14:105182581-105333748	0.00028451	7	AKT1
CDK6	49	7q21.2	chr7:92196092-92530348	0.00069831	3	KRIT1, ANKIB1, PEX1, AKAP9, VPS50
6p21.1	50	6p21.1	chr6:41519930-44297771	0.0010459	70	MEA1, KLHDC3, POLR1C, PPP2R5D, MAD2L1BP, YIPF3, MRPL2, RRP36, MRPL14, BYSL, TJAP1
EHF	51	11p13	chr11:34574296-34857324	0.0011002	1	EHF
6q21	52	6q21	chr6:107098934-107359899	0.0011806	4	QRSL1, RTN4IP1
19q13.42	53	19q13.42T	chr19:55524376-59128983	0.0013319	138	HSPBP1, ZNF865, ZNF579, ZNF787, EPN1, FIZ1, ZNF444, ZNF524, ZNF580, ZNF784, RPL28, ZNF581
17q21.33	54	17q21.33	chr17:47346425-47509605	0.0025775	2
BPTF	55	17q24.2	chr17:65678858-66288612	0.0028375	11	BPTF, HELZ
E2F3	56	6p22.3	chr6:19610794-22191922	0.0033658	7	NUP153, DEK, KDM1B
19p13.2	57	19p13.2	chr19:10260457-10467501	0.0038041	12	MRPL43, POLL, CUEDC2, FBXL15, NDUFB8
17q25.1	58	17q25.1	chr17:73568926-73594884	0.012337	2
KDM2A	59	11q13.2	chr11:67025375-67059633	0.012445	3	SSSCA1, UQCC3, TUT1, ZNHIT2, BAD, BRMS1, SAC3D1, NDUFS8, DRAP1, SART1, UBXN1, TMEM134, FAU, OTUB1, ARL2, CCS, RNASEH2C, TRPT1, NUDT22
8q21.13	60	8q21.13	chr8:80432552-81861219	0.020548	6	MRPS28
2p15	61	2p15	chr2:59143237-63355557	0.021056	25	USP34, REL
14q11.2	62	14q11.2T	chr14:1-21645085	0.027803	57	PSMB5, C14orf119
NEDD9	63	6p24.2	chr6:11180426-11620845	0.082606	2	NEDD9
5p13.1	64	5p13.1	chr5:35459650-50133375	0.094657	61	C5orf22, PAIP1, DNAJC21, GOLPH3, C5orf51, NUP155, ZNF131, NIPBL, ZFR
LINC00536	65	8q23.3	chr8:116891361-117360815	0.095294	1	TRPS1
10p15.1	66	10p15.1	chr10:4190059-6130004	0.10391	21
22q11.21	67	22q11.21	chr22:18613558-23816427	0.13213	105	ROMO1, DYNLRB1, ERGIC3, RALY, PIGU, EIF6
PHF3	68	6q12	chr6:63883156-64483307	0.17851	4	PHF3
PAX8	69	2q13	chr2:113990138-114122826	0.19717	2	PAX8
9p24.2	70	9p24.2T	chr9:1-7379570	0.20405	45	UHRF2, RANBP6
B) Deletion
Peak Name	Rank	Genomic location	Peak region	GISTIC q-value	Gene count	GLA
CDKN2A	1	9p21.3	chr9:21865498-22448737	0	4	CDKN2A
STK11	2	19p13.3	chr19:1103715-1272039	1.46e-238	7	CDC34, POLRMT, RNF126
PDE4D	3	5q11.2	chr5:58260298-59787985	2.02e-143	3	PDE4D
PARK2	4	6q26	chr6:161693099-163153207	5.85e-137	1	PRKN
LRP1B	5	2q22.1	chr2:139655617-143637838	4.25e-107	1	LRP1B
CSMD1	6	8p23.2	chr8:2079140-6262191	2.39e-96	1	CSMD1
1p36.23	7	1p36.23	chr1:7829287-8925111	1.23e-93	8
ARID1A	8	1p36.11	chr1:26900639-27155421	5.74e-87	2	GPATCH3, NUDC, TMEM222, GPN2
PTEN	9	10q23.31	chr10:89615138-90034038	1.12e-79	2	ATAD1, PTEN
WWOX	10	16q23.1	chr16:78129058-79627770	8.14e-76	1	WWOX
RB1	11	13q14.2	chr13:48833767-49064807	3.88e-75	2	COG6, COG3, AKAP11, ELF1, FNDC3A, GPALPP1, VPS36, ZC3H13, UTP14C
FAM190A	12	4q22.1	chr4:90844993-93240505	9.26e-75	1	FAM190A
2q37.3	13	2q37.3T	chr2:241544527-243199373	1.77e-70	29	STK25, ATG4B, ING5, THAP4
22q13.32	14	22q13.32T	chr22:48026910-51304566	8.2e-65	45	SELENOO, TRABD, HDAC10, LMF2, NCAPH2, SCO2
11p15.5	15	11p15.5T	chr11:1-709860	1.02e-62	34	HRAS, TSSC4, MOB2, POLR2L, PTDSS2, MRPL23, PSMD13
LINC00290	16	4q34.3	chr4:178911874-183060693	1.21e-55	1	TENM3
FHIT	17	3p14.2	chr3:59034763-61547330	3.01e-55	1	FHIT
RBFOX1	18	16p13.3	chr16:5144019-7771745	1e-45	1	RBFOX1
PTPRD	19	9p24.1	chr9:8310705-12693402	3.24e-38	1	PTPRD
18q23	20	18q23T	chr18:74979706-78077248	1.69e-37	12	PARD6G
FAT1	21	4q35.2	chr4:187475875-188227950	6.81e-36	1	FAT1
MPHOSPH8	22	13q12.11T	chr13:1-20535070	2.57e-31	10	LATS2
15q15.1	23	15q15.1	chr15:41795901-42068054	2.71e-29	4	TP53BP1, ZSCAN29, UBR1
11q25	24	11q25T	chr11:133400280-135006516	4.93e-26	14	NTM
1p13.2	25	1p13.2	chr1:110048528-117687124	1.69e-25	100	RSBN1, TRIM33, HIPK1
NF1	26	17q11.2	chr17:29326736-29722618	6.59e-23	5	NF1
MACROD2	27	20p12.1	chr20:14302876-16036135	9e-19	3	MACROD2
7p22.3	28	7p22.3T	chr7:1-1496620	1.04e-17	18
6p25.3	29	6p25.3	chr6:1608837-2252425	3.01e-17	2
21q11.2	30	21q11.2T	chr21:1-15482604	2.34e-14	14
9p13.1	31	9p13.1	chr9:38619152-71152237	9.75e-14	48
ZNF132	32	19q13.43T	chr19:58661582-59128983	3.77e-13	24	ZNF134, ZNF304, ZNF551, ZNF776, ZNF17
5q15	33	5q15	chr5:73236070-114508587	8.15e-13	156	WDR36, YTHDC2, APC
MLL3	34	7q36.1	chr7:151817415-152136074	9.26e-13	1	MLL3
19q13.32	35	19q13.32	chr19:47332686-47763284	2.38e-12	10
15q12	36	15q12T	chr15:1-32929863	3.4e-11	155	KIF2A, IPO11
12q24.33	37	12q24.33T	chr12:131692956-133851895	1.24e-10	27	FBRSL1
10q26.3	38	10q26.3T	chr10:135190263-135534747	2.09e-10	14	ZNF511, ECHS1
6q21	39	6q21	chr6:86319089-117076132	4.56e-10	141	HEIH, LINC00847
PPP2R2A	40	8p21.2	chr8:25896447-26250295	1.78e-09	1	CCAR2, CHMP7, ELP3, CCDC25, INTS9
IKZF2	41	2q34	chr2:211542637-214143899	3.24e-09	4	ERBB4
CNTN4	42	3p26.3T	chr3:1-3100786	6.44e-09	3	CNTN4
3p12.2	43	3p12.2	chr3:75363575-86988125	1.22e-07	12	ROBO1
RAD51B	44	14q24.1	chr14:68275375-69288431	1.38e-07	2	RAD51B
11q23.1	45	11q23.1	chr11:105849158-117024891	5.31e-07	84	CUL5, NPAT, TMEM123, YAP1, BIRC2
IMMP2L	46	7q31.1	chr7:109599468-111366370	5.74e-07	2	IMMP2L
NEGR1	47	1p31.1	chr1:71699756-74522473	7.25e-07	2	NEGR1
BRCA1	48	17q21.31	chr17:41178765-41336147	7.25e-07	2	BRCA1
9q34.3	49	9q34.3	chr9:135441810-139646221	8.73e-06	94	PMPCA, SNAPC4, SDCCAG3
ANKS1B	50	12q23.1	chr12:99124001-100431272	8.73e-06	2	UHRF1BP1L, SCYL2, APAF1
DMD	51	Xp21.2	chrX:30865118-34644819	5.15e-05	4	Removed
ZMYND11	52	10p15.3T	chr10:1-857150	7.12e-05	4	ZMYND11
PRKG1	53	10q11.23	chr10:52644085-54061437	9.79e-05	3	PRKG1
FOXK2	54	17q25.3	chr17:80443432-80574531	0.00019271	1	FOXK2
AGBL4	55	1p33	chr1:48935280-50514967	0.000219	2	AGBL4
CDKN1B	56	12p13.1	chr12:12710990-12966966	0.00035777	5	CDKN1B
14q32.33	57	14q32.33T	chr14:94381429-107349540	0.00074358	227	TRIP11, GOLGA5, BTBD7, PPP4R3A, ZC3H14
14q11.2	58	14q11.2T	chr14:1-30047530	0.0010181	162	CHD8, SUPT16H, TOX4
2p25.3	59	2p25.3T	chr2:1-20072169	0.0011137	86	MYCN
5q35.3	60	5q35.3T	chr5:153840473-180915260	0.0028515	212	NSD1, FAF2
PTTG1IP	61	21q22.3	chr21:46230687-46306160	0.012227	1	PTTG1IP
22q11.1	62	22q11.1T	chr22:1-17960585	0.020332	15
SMAD4	63	18q21.2	chr18:48472083-48920689	0.036866	3	SMAD4
17p13.3	64	17p13.3T	chr17:1-1180022	0.040814	16	MRM3, TIMM22
4p16.3	65	4p16.3T	chr4:1-1243876	0.056345	27
9p21.2	66	9p21.2	chr9:27572512-28982153	0.091742	3
10q25.1	67	10q25.1	chr10:99340084-113910615	0.11879	137	SHOC2
SMYD3	68	1q44	chr1:245282267-247110824	0.15417	8	SMYD3
8p11.21	69	8p11.21	chr8:42883855-47753079	0.17382	4
Xp22.33	70	Xp22.33T	chrX:1-11137490	0.21462	52	Removed
